1 Dynamics-function relationship of N-terminal acetyltransferases: the  $\beta 6\beta 7$   
2 loop modulates substrate accessibility to the catalytic site

3  
4 Angèle ABBOUD<sup>1,2</sup>, Pierre BÉDOUCHA<sup>1,2</sup>, Jan BYŠKA<sup>1</sup>, Thomas ARNESEN<sup>3,4,5</sup>  
5 and Nathalie REUTER<sup>2,6\*</sup>

6  
7 <sup>1</sup>Department of Informatics, University of Bergen, Bergen, Norway;

8 <sup>2</sup>Computational Biology Unit, Department of Informatics, University of Bergen, Bergen, Norway;

9 <sup>3</sup>Department of Biological Sciences, University of Bergen, Bergen, Norway;

10 <sup>4</sup>Department of Biomedicine, University of Bergen, Bergen, Norway;

11 <sup>5</sup>Department of Surgery, Haukeland University Hospital, Bergen, Norway;

12 <sup>6</sup>Department of Chemistry, University of Bergen, Bergen, Norway

13

14

15

16 \*Corresponding authors: Nathalie Reuter, Phone: +47 55 58 40 40, Email : [nathalie.reuter@uib.no](mailto:nathalie.reuter@uib.no)

17

18

19 **Keywords:** Acetylation; N-terminal acetyltransferases; protein dynamics; normal modes analysis; ligand specificity

20

21

## 22 **Abstract**

23 N-terminal acetyltransferases (NATs) are enzymes catalysing the transfer of the acetyl from Ac-CoA to the  
24 N-terminus of proteins, one of the most common protein modifications. Unlike NATs, lysine  
25 acetyltransferases (KATs) transfer an acetyl onto the amine group of internal lysines. To date, not much is  
26 known on the exclusive substrate specificity of NATs towards protein N-termini. All the NATs and some  
27 KATs share a common fold called GNAT. The main difference between NATs and KATs is an extra  
28 hairpin loop found only in NATs called  $\beta 6\beta 7$  loop. It covers the active site as a lid. The hypothesized role of  
29 the loop is that of a barrier restricting the access to the catalytic site and preventing acetylation of internal  
30 lysines. We investigated the dynamics-function relationships of all available structures of NATs covering  
31 the three domains of life. Using elastic network models and normal mode analysis, we found a common  
32 dynamics pattern conserved through the GNAT fold; a rigid V-shaped groove, formed by the  $\beta 4$  and  $\beta 5$   
33 strands and three relatively more dynamic loops  $\alpha 1\alpha 2$ ,  $\beta 3\beta 4$  and  $\beta 6\beta 7$ . We identified two independent  
34 dynamical domains in the GNAT fold, which is split at the  $\beta 5$  strand. We characterized the  $\beta 6\beta 7$  hairpin  
35 loop slow dynamics and show that its movements are able to significantly widen the mouth of the ligand  
36 binding site thereby influencing its size and shape. Taken together our results show that NATs may have  
37 access to a broader ligand specificity range than anticipated.

## 38 **Author summary**

39 N-terminal acetylation concerns 80% of eukaryotic proteins and is achieved by enzymes called the  
40 N-terminal acetyltransferases (NATs). They belong to the large family of acetyltransferases and  
41 adopt the GNAT fold. Interestingly most lysine acetyltransferases (KATs), which acetylate  
42 specifically internal lysines, share the same fold. Rationale for the ligand recognition by the GNAT  
43 enzymes remains unclear. Proteins are dynamic entities that utilize their structural flexibility to  
44 carry out functions in living cells. By studying the dynamics throughout the entire NATs family,  
45 we found that the slow dynamics of the fold is strongly conserved. We also revealed the mobility of  
46 the active site lid, namely the  $\beta$ -hairpin loop  $\beta 6\beta 7$ , which is one of the main structural differences between  
47 the NATs and the KATs. The size and shape of the ligand binding site depend on movements of that  $\beta$ -

48 hairpin loop. We suggest that in attempts of mapping NATs specificity or ligand design the fold flexibility  
49 should be taken into consideration.

## 50 **Introduction**

51 Acetyltransferases are enzymes catalysing the transfer of an acetyl group from the co-factor acetyl-  
52 coenzyme A (Ac-CoA) to a substrate. Among them, lysine acetyltransferases (KATs) and N $\alpha$ -terminal  
53 acetyltransferases (NATs) perform protein acetylation to either lysine side chains or N-termini of  
54 polypeptide chains, respectively. NATs acetylate 80 to 90% of the proteins of the human proteome [1] and  
55 N-terminal acetylation has been shown to play a role in various biological processes from protein folding to  
56 gene regulation [2]. Dysregulation or mutations of NATs have been linked to several diseases including  
57 tumour development [2–5] and initiatives are already undertaken to develop inhibitors targeting the relevant  
58 NATs [6].

59 Most acetyltransferases share the GNAT fold (Gcn5-related N-acetyltransferases) [7]. It consists of a  
60 three-layered  $\alpha\beta\alpha$  sandwich containing seven  $\beta$ -sheets and four  $\alpha$ -helices (Fig. 1). The GNAT fold displays  
61 two features that are conserved through most of the KATs and NATs and are related to the transfer of an  
62 acetyl to an amino group. The first is a conserved sequence motif essential for Ac-CoA binding  
63 (Q/RxxGxG/A) and located on the turn between strand  $\beta$ 4 and helix  $\alpha$ 3 [7–9]. The  $\beta$ 4 strand together with  
64  $\beta$ 4- $\alpha$ 3 and  $\alpha$ 4 form much of the Ac-CoA binding site. The second salient feature of the GNAT fold is the V-  
65 shaped configuration of the two parallel strands  $\beta$ 4 and  $\beta$ 5, forming a groove where the extremities of the  
66 Ac-CoA and of the substrate peptide meet, positioning the acetyl group and the amino group close enough  
67 for the catalytic reaction to occur [7].

68  
69 **Fig 1. GNAT fold and substrate binding sites in NAT catalytic domains.** (A) Cartoon representation of  
70 the GNAT fold of human Naa50 (PDB ID: **3TFY**). It consists of 6  $\beta$ -sheets (green) and 4  $\alpha$ -helices (salmon  
71 pink) organised in the following topology: B1-H1-H2-B2-B3-B4-H3-B5-H4-B6. The Ac-CoA represented  
72 in sticks with the backbone in grey sits between helix  $\alpha$ 4 and the  $\beta$ 4 $\alpha$ 3 loop. (B) Human Naa50 (cartoons  
73 and blue solvent-accessible surface) bound to substrate Met-Leu-Gly (van der Waals spheres) (PDB ID:

## Dynamics-function relationship of NATs

74 **3TFY**). (C) Naa60 (grey solvent-accessible surface) bound to a bisubstrate CoA-Ac-Met-Lys-Ala-Val.

75 Loops  $\beta 6\beta 7$  and  $\alpha 1\alpha 2$  are labelled in (B) and (C).

76 Substrate specificity varies drastically within the NATs, offering a palette of enzymes able to target a  
77 large spectrum of N-terminal sequences. As of now, eight NATs (NatA-NatH) have been identified in  
78 eukaryotes [2,10,11], three in prokaryotes (RimI, RimJ and RimL) [12,13] and one in archaea (referred here  
79 as ArNat) [14]. NATs are classified based on their composition and substrates. Comparison of structures of  
80 NATs resolved by X-ray crystallography and KATs revealed the presence of a seventh  $\beta$ -strand at the C-  
81 terminus as the main conserved characteristic of the NATs [15–17]. The extra  $\beta$ -hairpin  $\beta 6\beta 7$ , the  $\alpha 1\alpha 2$  loop  
82 and the helix  $\alpha 2$  contain amino acids forming the boundary of the binding pocket, which we hereafter refer  
83 to as the *mouth* of the binding pocket. NAT substrates usually position two to three residues in the peptide  
84 binding site [15–18]. Two conserved tyrosines located on the  $\beta 6\beta 7$  loop and another one on the  $\alpha 1\alpha 2$  loop  
85 have been shown to interact with the substrate backbone via hydrogen bonds [19]. Both loops cover the  
86 groove containing the catalytic site (Fig. 1B) to which substrate peptide and Ac-CoA bind from opposite  
87 sides. The loops have been proposed to prevent the access of internal lysine to the catalytic site and as a  
88 consequence prevent their acetylation by NATs [15,20]. However, there have been reports of lysine  
89 acetylations by NATs [18,21–27]. Moreover, NATs can be inhibited by so-called bisubstrate inhibitors  
90 consisting of a short polypeptide covalently bound to the Ac-CoA [6,17,28,29]. The X-ray structure of the  
91 human NatF bound to bisubstrate CoA-Ac-MKAV<sub>7</sub> shows that the inhibitor is placed in the Ac-CoA and  
92 substrate binding site with the  $\beta 6\beta 7$  hairpin loop hanging over the top of it [28] (Fig. 1C). This structure  
93 raises the question of how the bisubstrate accesses both the ligand and Ac-CoA binding sites and as a  
94 consequence suggests the mouth of the active site needs to be able to open up.

95 Using relatively short 10 nanoseconds-long molecular dynamics simulations of the catalytic domains of  
96 two human NATs, we earlier showed for hNaa50 that (i) helix  $\alpha 2$  undergoes flexibility changes upon ligand  
97 binding and (ii) the  $\beta 6\beta 7$  hairpin loop was the most flexible region of the protein [19]. Likewise, we  
98 observed the  $\beta 6\beta 7$  loop of the human Naa10 to be flexible [30] in 100 ns-long molecular simulations. The  
99 time-scale of these simulations did not allow us to investigate conformational changes happening on longer  
100 time-scales, such as displacements of loops. Enzyme dynamics is known to be important for their function.

## Dynamics-function relationship of NATs

101 Notably, catalytic residues are reported to be placed at rigid positions of the protein structure, while amino  
 102 acids involved in substrate binding are likely to have a higher flexibility [31–33]. Furthermore, functionally  
 103 relevant flexibility is conserved between enzymes sharing the same fold. Normal mode analysis (NMA)  
 104 using elastic network models (ENM) is an efficient computational method that has proven reliable to  
 105 characterize the flexibility properties intrinsic to protein structures [34–40]. It has also been successfully  
 106 used to conduct comparative analyses of multiple protein structures [31,34].

107 In this study, we characterize the dynamics of all available structures of NATs and compare them to  
 108 uncover dynamics patterns intrinsic to the GNAT fold and relevant for function.

109

## 110 Results

111 Our dataset consists of 34 structures of 15 distinct proteins listed in Table 1 and is representing ten  
 112 types of NATs defined according to their composition and substrates (S1 and S2 Tables). The dataset spans  
 113 the three domains of Life, where six out of eight NATs stem from eukaryotes (NatA, NatB, NatD, NatE,  
 114 NatF, NatH), three from bacteria (RimI, RimJ and RimL) and one from archaea (ArNat). In what follows,  
 115 the ten types of NATs found in our dataset are referred to by the name of the catalytic subunit of each NAT  
 116 complex (Naa10, Naa20, etc... reported in Table 1 in the column titled “Group”).

117 **Table 1. N-terminal acetyltransferases (NATs) found in PROSITE, Uniprot and PDB databases.**

| Group | Super Kingdom /            | E.C       | Uniprot | PDB ID                                                   | Chain            |
|-------|----------------------------|-----------|---------|----------------------------------------------------------|------------------|
| ArNat | Archaea                    | 2.3.1.-   |         |                                                          |                  |
|       | <i>Sulfolobus</i>          |           | Q980R9  | <b>2x7b</b> [41], 4lx9[42], 4r3k[43], 4r3l[43], 5c88[44] | A, A, A, A, A    |
|       | <i>Thermoplasma</i>        |           | Q97CT7  | <b>4pv6</b> [45]                                         | A                |
| Naa10 | Eukaryota                  | 2.3.1.255 |         |                                                          |                  |
|       | <i>Schizosaccharomyces</i> |           | Q9UTI3  | <b>4kvm</b> [17], 4kvo[17], 4kvx[17]                     | E, E, B          |
|       | <i>Saccharomyces</i>       |           | P07347  | 4xnh, 4xpd, 4y49, 4hnw, 4hnx, 4hny                       | B, B, B, B, B, B |
| Naa20 | Eukaryota                  | 2.3.1.254 |         |                                                          |                  |
|       | <i>Candida</i>             |           | C4YDZ9  | 5k04[46], <b>5k18</b> [46]                               | B, B             |
| Naa40 | Eukaryota                  | 2.3.1.257 |         |                                                          |                  |
|       | <i>Schizosaccharomyces</i> |           | Q9USH6  | <b>4ua3</b> [47]                                         | A                |

## Dynamics-function relationship of NATs

|       |                     |           |        |                                                                  |               |
|-------|---------------------|-----------|--------|------------------------------------------------------------------|---------------|
|       | <i>Homo sapiens</i> |           | Q86UY6 | <b>4u9v</b> [47], 4u9w[47]                                       | A, B          |
| Naa50 | Eukaryota           | 2.3.1.258 |        |                                                                  |               |
|       | <i>Homo sapiens</i> |           | Q9GZZ1 | 2ob0, 2psw, <b>3tfy</b> [15], 4x5k                               | A, A, C, A    |
| Naa60 | Eukaryota           | 2.3.1.259 |        |                                                                  |               |
|       | <i>Homo sapiens</i> |           | Q9H7X0 | 5hgz[18], <b>5hh0</b> [18], 5hh1[18], <b>5icv</b> [28], 5icw[28] | A, A, A, B, A |
| Naa80 | Eukaryota           | -         |        |                                                                  |               |
|       | <i>Drosophila</i>   |           | Q59DX8 | <b>5wjd</b> [48], 5wje[48]                                       |               |
| RimI  | Bacteria            | 2.3.1.128 |        |                                                                  |               |
|       | <i>Salmonella</i>   |           | Q8ZJW4 | 2cnm[29], <b>2cns</b> [29], 2cnt[29]                             | A, A, A       |
|       | <i>Escherichia</i>  |           | P0A946 | <b>5isv</b>                                                      | A             |
| RimJ  | Bacteria            | 2.3.1.128 |        |                                                                  |               |
|       | <i>Aliivibrio</i>   |           | Q5DZH6 | <b>3igr</b>                                                      | A             |
| RimL  | Bacteria            | 2.3.1.128 |        |                                                                  |               |
|       | <i>Salmonella</i>   |           | Q8ZPC0 | 1s7f[49], 1s7k[49], <b>1s7l</b> [49], 1s7n[49], 1z9u             | A, A, A, A, B |
|       | <i>Thermus</i>      |           | Q5SHD1 | <b>2z0z</b> [50], 2zxv[50]                                       | A, A          |
|       |                     |           | Q72HN8 | 2z10[50], 2z11[50]                                               | A, A          |

118 Representative structures chosen for each Uniprot code are highlighted with a bold PDB ID. Two representatives were  
 119 selected for the Naa60 group as they have different topologies (5hh0 contains one extra helix at the C-terminus). PDB  
 120 IDs written in light grey are available structures that are not included in our dataset due to poor quality (see Methods).  
 121 One chain was selected for the calculations. For information on the dataset preparation the reader is referred to the  
 122 experimental procedures.

### 123 124 **(1) The NATs' functional diversity builds upon the GNAT fold and is fine-tuned by accessory** 125 **structural elements**

126 We aligned all structures in the dataset using the multiple structure alignment tool  
 127 MUSTANG [51] (see Experimental procedures). The structure of Naa50 (PDB ID: **3TFY**) was used as  
 128 reference. The alignment led to 119 C-alpha atoms' positions conserved (Fig. 2A). While sequence  
 129 similarity between pairs of NATs is relatively low (23% identity on average), the secondary structure  
 130 elements of the GNAT fold align well (Fig. 2B). The region between the end of strand  $\beta$ 4 and helix  $\alpha$ 4 is the

## Dynamics-function relationship of NATs

131 most conserved sequence-wise. It contains several of the amino acids involved in catalysis and located on  
132 strands  $\beta 4$  and  $\beta 5$ , as well as the Ac-CoA binding motif (R/QxxGxG/A on  $\beta 4$ - $\alpha 3$ ) (Fig. 2B). Noticeably,  
133 position 213 of the alignment (Asn114 in Naa50) is an asparagine conserved through all the 14 NATs,  
134 except in Naa80 where it is replaced by an aspartate (Asp 127) (Fig. 2B). This residue sits close to the  
135 oxygen of the Acetyl-CoA pantothenic acid for all structures [43]. Structural differences between NATs are  
136 restricted primarily to the N- and C-terminal regions, before helix  $\alpha 2$  and after strand  $\beta 6$ , respectively. The  
137 differences stem either from the longer elements of the GNAT domain or from additional accessories. The  
138 latter are secondary structure elements that are not part of the GNAT fold such as the N-terminal helix in  
139 Naa40, referred to as helix  $\alpha 0$  or the sixty-one amino acid-long extra C-terminal helical segment in Naa60.  
140 Only the first thirty amino acids are resolved in the X-ray structure ( $\alpha 5$  on Fig. 2C) but two helices are  
141 predicted from sequence analysis [52].

142  
143 **Fig 2. Structural alignment of Naa representatives.** (A) MUSTANG structural alignment of all NAT  
144 structures listed in Table 1. The backbone of each structure is represented with lines except for that of the  
145 reference structure Naa50 (PDB ID: **3TFY**), which is represented with cartoons. The red beads represent the  
146 116 aligned C-alpha atoms. (B) Multiple sequence alignment resulting from the structural alignment. Naa50  
147 sequence is written with blue fonts, Ac-CoA-binding motifs are highlighted with cyan boxes and residues  
148 involved in the catalytic activity with green boxes. Sequences are labelled with the PDB ID from which  
149 their secondary structure elements are retrieved. All are shown above the sequence alignment except for *S.*  
150 *cerevisiae* Naa10 due to poor secondary structure annotation (PDB ID: **4Y49**). The image results from the  
151 use of ESPript [53]. (C) Cartoon representation of the shared GNAT fold (in grey) and structural variations:  
152 helix  $\alpha 0$  in Naa40, helix  $\alpha 5$  in Naa60, long  $\beta 6\beta 7$  loops in Naa40 and Naa60, long  $\alpha 1\alpha 2$  loops in Naa40 and  
153 RimL, long  $\beta 3\beta 4$  loops in ArNats and Naa60.

154  
155 We quantified the structural similarity between Naas by calculating pairwise root mean square  
156 deviations (RMSD) between the thirty-four structures of the dataset. The clustered values presented on a  
157 heatmap reveal two main groups (Fig. 3). As expected, RMSD values between structures belonging to the

## Dynamics-function relationship of NATs

158 same group are below 1Å, which is in agreement with the fact that structures within a group are orthologues  
159 and/or structures of the same protein but in different forms (e.g. apo vs. holo) (S1 Table). To evaluate the  
160 influence of the redundancy present in the dataset, we performed the analysis on a representative dataset  
161 that only consists of one structure per Uniprot accession number (Table 1) and found no difference in the  
162 clustering (S2 Fig).

163  
164 **Fig 3. Heatmap representation of the pairwise Root Mean Square Deviations (RMSD).** The  
165 dendrogram reflects the hierarchical clustering based on the RMSD values. The heatmap color scale goes  
166 from red ( $0\text{Å} < \text{RMSD} < 1\text{Å}$ ; structural similarity) to yellow ( $3\text{Å} < \text{RMSD} < 4\text{Å}$ ). Names of enzymes from  
167 eukaryotes are highlighted in blue, those of bacteria in purple and green is used for archaeal NATs.

168  
169 The first group consists of: ArNats, Naa10, Naa20, Naa50, Naa60, RimI. In this cluster, the closest  
170 structures are the archaeal Naas and the eukaryotic Naa10 with RMSD values of 1.2 Å. The RMSDs  
171 between ArNats (e.g. 4lx9) and Naa10, Naa50, Naa60 and the RimI are lower than 2Å. The structural  
172 proximity of the archaeal Naa with enzymes belonging to other groups is in agreement with what is known  
173 about its substrate specificity. The archaeal Naa from *Sulfolobus* uses two different catalytic strategies; like  
174 Naa10 enzymes it can acetylate serines or it can acetylate methionines like the Naa50 enzymes (S2 Table).  
175 Mutations of key residues from the  $\alpha 1\alpha 2$  loop were shown to shift the substrate specificity from small  
176 amino acids to methionines [42]. In this study, Liszczak et al. suggested these mutations as part of a model  
177 of the evolution of a eukaryotic ancestor to a more diverse family with different substrate specificity. The  
178 second main group consists of three clusters Naa40, Naa80 and the bacterial RimJ and RimL, which appear  
179 to be the most structurally distant from other structures in the dataset with RMSD values between 2.5 and  
180 3.9 Å. They are composed of longer elements in the GNAT fold that influence the orientation of the  
181 secondary structure moving them further away from the other NATs. As shown in Fig. 2B the entire region  
182 from  $\alpha 1$  to  $\alpha 2$  is longer in RimL than in other Naas (6, 4 and 7 additional residues for helices  $\alpha 1$ ,  $\alpha 2$  and  
183  $\alpha 1\alpha 2$  loop, respectively). Naa40 also has an extended  $\alpha 1$  helix of eight amino acids and an extra N-terminal



## Dynamics-function relationship of NATs

184 helix  $\alpha 0$  consisting of 17 amino acids. This  $\alpha 0$  helix sits under the GNAT fold and changes the topology of  
185 the region  $\beta 1$ - $\alpha 2$ . The  $\alpha 1\alpha 2$  loop and the longer  $\alpha 1$  helix cover the active site and the  $\beta 6\beta 7$  hairpin loop is  
186 flanked away from the active site (Fig. 2C). The structure of the  $\beta 6$ - $\beta 7$  region in Naa80 is different from that  
187 of typical NATs. It has a shorter  $\beta 6$ -strand, which leads to a different orientation of the  $\beta 6\beta 7$  loop and a  
188 ligand binding site opened more widely than in the other NATs [48].

189

### 190 **(2) Measure of pairwise flexibility similarity between NATs yield a grouping that coincides** 191 **with similarity in substrate selectivity**

192 The Bhattacharyya score (BC score) quantifies the intrinsic dynamics (dis)similarity between each pair  
193 of aligned cores of proteins in a dataset [54]. To this goal we perform normal mode analyses using elastic  
194 network models for each of the structures present in our dataset. We then calculated and compared the BC  
195 scores of the representative dataset (Table 1). A heatmap representation of those values together with a  
196 dendrogram representing the clustering is shown in Fig. 4A. We observe that the structures are sorted in  
197 three main groups containing (1) Naa10, Naa20, Naa50, Naa60, archaeal NATs, bacterial RimI; (2)  
198 bacterial RimJ and RimL, as well as Naa40 which is the only eukaryotic NAT in this group and (3) Naa80.  
199 Interestingly, the first group is sorted between the Naas acetylating methionine: ArNats, Naa50 and Naa60  
200 and the one acetylating small residues or alanine exclusively: Naa10 and RimI, respectively (S2 Table).  
201 Naa20 acetylates methionines followed by acidic residues and is clustered with Naa10. The latter has also  
202 been shown to shift substrate specificity towards acidic residues in its uncomplexed form [55]. Naa40 is  
203 also one of the most selective Naas since it acetylates only the Serine of the N-terminal of histones H4 and  
204 H2A. The bacterial Rims also have a narrow specificity and acetylate only ribosomal proteins (S2 Table).  
205 Naa80 is sharing the lowest BC scores with the other NATs. In addition of having a substrate-binding site  
206 wider than the other NATs, it also has a restricted substrate specificity towards the N-terminus of actin.

207 The BC-clusters show that flexibility (dis)similarities are encrypted in the coarse-description of the  
208 structure (actually restricted to its backbone) and in the harmonic potential of the ENM model (directly  
209 related to the proteins packing density).

210

211 **Fig 4. Comparison of the dynamics of the NATs using the Bhattacharyya score (BC score) on a non-**

212 **redundant dataset.** (A) Heatmap representation of the pairwise BC score between the representative

213 structures (see Experimental procedures). The color scale of the BC score goes from red for high similarity

214 in intrinsic dynamics to yellow for higher dissimilarity. The dendrogram is the hierarchical clustering of the

215 pairwise BC score. The names of the groups are written in boxes colored in blue for eukaryotes, purple for

216 bacterial and green for archaeal NATs. (B) Cartoon representation of the structures aligned and used to

217 calculate the pairwise BC score. The helices  $\alpha 1$  and  $\alpha 2$  are colored according to the cluster they belong to

218 (see color of boxes on the axes of the dendrogram). The first cluster composed of the archaeal Naa, Naa10,

219 Naa20, Naa50, the Naa60 and the RimI (colored in dark blue) shares a shorter helix  $\alpha 1$  than that of the

220 second cluster consisting of Naa40 (colored in cyan), RimJ and RimL (colored in orange). Naa80 (colored

221 in magenta) separates from the others; it has the shortest  $\alpha 1\alpha 2$  loop and the widest binding site of all NATs.

222

223 **(3) ENM-NMA reveals the signature flexibility pattern of the GNAT fold**

224 Similarity in fold or topology is generally associated with similarity in flexibility and dynamics

225 [33,56]. We here intend to characterize the flexibility intrinsic to the topology of the GNAT fold. We then

226 compare the results from ENM-NMA for each structure to reveal flexibility patterns intrinsic to the

227 common fold. We first compute the normalised fluctuations for each amino acid in each structure, and the

228 correlations between pairs of amino acids (Fig. 5A). The latter reveals how local motions are coupled across

229 different regions of the fold.

230

231 **Fig 5. Normalized fluctuations and correlations.** (A) Aligned normalized fluctuations for all NAT

232 structures. For clarity one color is used for structures belong to the same group. The fluctuations depicted in

233 plain lines are for positions where all structures align, while the dotted lines reflect the fluctuations of

234 positions where not all NATs align. The secondary structures aligned in than 80% of all NATs are shown

235 using green bars for the B-strands and red bars for the helices. (B) The correlation map of Naa50 (PDB ID:

## Dynamics-function relationship of NATs

236 **3TFY**) shows the correlation patterns found in all maps (shown in Supporting Information Figure S3).

237 Long-range correlations are found within two blocks highlighted within the green and pink frames. For all

238 NATs the highest correlations are found within these blocks and not in-between. (C) Schematic

239 representation of the main fluctuations and correlations on a cartoon representation of Naa50 (PDB ID:

240 **3TFY**). The two blocks of correlations are distinguished by the color of their surface (green and pink).

241 Regions with highest fluctuations are shown in red and those with lowest fluctuations in yellow.

242

243 **Ac-CoA and the peptide substrate do not affect fluctuations significantly.** X-ray structures in our

244 dataset have been solved in different forms including with or without Ac-CoA and/or peptide substrate. For

245 the sake of consistency, we should perform all computations using an ENM of the enzymes only. We thus

246 first evaluate the effect of removing the Ac-CoA and peptide substrate from X-ray structure on the

247 computed flexibility of the fold. We chose to compute the modes and normalized atomic fluctuations for the

248 yeast Naa10 as crystal structures of different forms of the enzyme are available, notably two slightly

249 different conformations, structures including Ac-CoA as well as structures including a bisubstrate inhibitor

250 that mimics the presence of both Ac-CoA and peptide substrate [17]. Ac-CoA is included in the ENM as 11

251 beads chosen to represent an atom every 4 Å (see Experimental procedures) Normalized fluctuations are

252 shown in S1 Fig. The positions of the minima and maxima are not affected by removing the Ac-CoA or

253 substrate. When Ac-CoA or the bisubstrate are removed from the three structures (PDB IDs: **4KVO**, **4KVX**

254 and **4KVM**) the mobility of  $\beta 4\alpha 3$  and of the N-terminal end of helix  $\alpha 4$  increases. Further, removing the

255 bisubstrate from 4kvm also influences the fluctuations of loop  $\beta 6\beta 7$  since it lies close to it. Generally,

256 fluctuations are affected locally (i.e. at the Ac-CoA and ligand-binding sites) but not to a significant extent

257 compared to the differences observed between NATs (Fig. 5A).

258

259 **The V-shaped  $\beta$ -strands characteristic of the GNAT fold form a rigid core of the enzyme, while loops**

260 **surrounding the binding site are mobile.** The normalized fluctuations are plotted on Fig. 5A. We observe

261 that the  $\beta$ -strands are the most rigid elements in all structures with  $\beta 4$  and  $\beta 5$  strands having the lowest

## Dynamics-function relationship of NATs

262 fluctuations. Interestingly these two strands carry most of the catalytic amino acids (Fig. 2B) and our  
263 observation matches earlier reports of catalytic residues being positioned at particularly rigid points in  
264 protein structures [32,33,57–59]. Furthermore,  $\beta 4$  and  $\beta 5$  are not assembling into a sheet along their whole  
265 length despite their proximity. Instead they form a “V shape” splitting the seven-stranded beta-sheet and  
266 creating a crevice where Ac-CoA and peptide substrate meet (Fig. 1).

267 In the region of the helices  $\alpha 1$  and  $\alpha 2$ , we notice a similar pattern of flexibility between all the  
268 structures where the loop  $\alpha 1\alpha 2$  and the helix  $\alpha 2$  fluctuate more. Molecular dynamics simulations of the  
269 human Naa50 and Naa10 have shown that the flexibility of helix  $\alpha 2$  is decreased in the presence of a  
270 substrate [19]. This region is also involved in the complex formation with the subunit Naa15 [30]. We  
271 observed high fluctuations for long unfolded N- and C-terminal ends. Besides those regions where  
272 fluctuations cannot be calculated reliably, the highest fluctuations are observed for the  $\beta 3\beta 4$  and  $\beta 6\beta 7$  loops.  
273 Two tyrosines located at positions 239 and 240 of the alignment (Y138 and Y139 in Naa50), and conserved  
274 across several groups (not in RimL, Naa40 and Naa80), are located on loop  $\beta 6\beta 7$ . They are known to be  
275 involved in substrate binding and form hydrogen bonds with the substrate [19].

276

277 **The GNAT fold is divided in two dynamical domains on either sides of the  $\beta 5$  strand.** We calculated  
278 the correlations for each of the representative structures. The representative correlation map is shown as a  
279 heatmap in Fig. 5B. All NATs share the same pattern consisting of two blocks with relatively little  
280 correlations between them (S3 Fig.) indicating that the proteins contains two dynamical domains [60]. The  
281 boundary between the two coincides with the V-shape split between  $\beta 4$  and  $\beta 5$ ; the first domain starts at  
282 sheet  $\beta 1$  and ends before strands  $\beta 5$ , and the second domain starts at strand  $\beta 5$  and ends with strand  $\beta 7$ .  
283 Within each domain, pairs of neighbouring  $\beta$ -strands are strongly correlated, as expected for beta-strands  
284 involved in the same sheet [61], but to a lesser extent for  $\beta 4$ - $\beta 5$ . This is explained by the distance between  
285  $\beta 4$  and  $\beta 5$  and the split in the fold at the  $\beta 4$ - $\beta 5$  interface. Correlations between strands and helices are  
286 weaker in general and happen through extremities of helices only. This is in agreement with what we  
287 observed for enzymes with the TIM barrel fold [33].  $\beta 5$  shows strong correlations with strands on either  
288 side;  $\beta 4$  and  $\beta 7$ . Correlations between domains are weak in comparison. There is an anti-correlation of such

## Dynamics-function relationship of NATs

289 type between loops  $\alpha 1\alpha 2$  and  $\beta 6\beta 7$ , which are in contact with each other forming a lid above the catalytic  
290 site. The potential flexibility of the loop  $\beta 6\beta 7$  to open and move independently of the other block reinforces  
291 the idea that it could create more room for the substrate to enter. Apart from the loop, it seems that the  
292 movement of the pink block (Fig. 5C) independently from the first block will influence the size of the  
293 binding pocket.

### 294 **(4) Structural differences in the N-terminal- $\alpha 2$ region contribute to difference in dynamics** 295 **between NATs**

296 Differences in intrinsic dynamics are encoded in the structure. The GNAT fold has a region of high  
297 variability from the N-terminal to the  $\alpha 2$  helix [7] (Fig. 2C and 4B). As noted earlier the helices  $\alpha 1$  and  $\alpha 2$   
298 are longer in Naa40, RimJ and RimL than in the other NATs from group 1. RimJ and L have 1.5 additional  
299 turns in each of the two helices compared to structures clustered in group 1, while the two extra turns of  
300 helix  $\alpha 1$  in Naa40 brings its C-terminal end over the active site at a location overlapping with that of the  
301  $\beta 6\beta 7$  hairpin loop in the other NATs. As a result  $\beta 6\beta 7$  is protruding further away from the protein core than  
302 in the other NATs and shows very large fluctuations as calculated from the modes (Fig. 2C and Fig. 5A).  
303 Furthermore Naa40 has an extra N-terminal helix  $\alpha 0$ , the movements of which are correlated with strands  
304  $\beta 3$  and  $\beta 4$  as well as with loop  $\alpha 3\beta 5$  (Fig. 6). On the contrary Naa80 has a shorter  $\alpha 1$ - $\alpha 2$  loop as well as a  
305 different orientation of its  $\beta 6\beta 7$  loop.

306  
307 **Fig 6. Correlations maps for the representative of the Naa40 group.** Helix  $\alpha 0$ , which is not present in  
308 other NATs, has high correlations with sheets  $\beta 3$  and  $\beta 4$ , and with the  $\alpha 3\beta 5$  loop.

309  
310 The fact that clustering structures according to the pairwise BC score sorts them into groups that differ  
311 by their N-terminal end to  $\alpha 2$  region indicates that the dynamics of this region is significantly different  
312 between the three groups.

313

314 **(5) The mobility of the  $\beta 6\beta 7$  loop influences peptide substrate accessibility to the catalytic site**

315 The low frequency modes yield deformations at the lowest energetic cost and have been shown to be  
316 functionally relevant [62,63]. Kurkcuoglu et al. showed that global motions of functional loops were  
317 important for fitting and binding of the substrate [64]. Given the high mobility of the  $\beta 6\beta 7$  loop and its  
318 position with respect to Ac-CoA and the substrate binding site, it is legitimate to wonder how its  
319 movements would influence the fairly narrow tunnel in which substrate and Ac-CoA meet. In order to  
320 determine the contributions of loop motions to the accessibility of the active site, we evaluated the changes  
321 to the surface area of the tunnel entrance when the structure conformation is modified following the lowest  
322 energy normal modes.

323 Further, we calculated how the surface area changes when the structure is modified following the  
324 individual lowest energy normal modes (see Experimental procedures). A reconstitution of the protein side  
325 chains from our C-alpha model was necessary to calculate the surface area of the mouth of the tunnel using  
326 CAVER Analyst [65] (see Experimental procedures). To this goal we first defined a static clipping plane  
327 using three residues (Tyr31, 73 and 138) lining the entrance (see Experimental procedures). We generated a  
328 trajectory along the first six lowest-frequency normal modes and held this static clipping plane for each  
329 frame of the trajectory. Note that the orientation of the clipping plane was extracted from the conformation  
330 of the X-ray structure and the same orientation was used in each frame. We then calculated the value of the  
331 surface area throughout the trajectory. We also calculated the surface area at a clipping plane  $2\text{\AA}$  away from  
332 the *mouth*, where the second and third residues of the substrate sit, in order to verify that no amino acid  
333 closes the access upwards of the active site.

334 The lowest energy modes show concerted motions of the three loops  $\beta 3\beta 4$ ,  $\beta 6\beta 7$  and  $\alpha 1\alpha 2$ . They  
335 surround the active site and their movements modify the shape of its *mouth* and its surface area (Fig. 7).  
336 However, the motions of each loop seem to have a different effect on the surface area. As illustrated in Fig.  
337 7B slight movements of Tyr138 in Naa50, found on the  $\beta 6\beta 7$  loop, drastically change the opening of the  
338 entrance (from  $50.5\text{\AA}$  to  $71.1\text{\AA}$ ). The  $\beta 6\beta 7$  loop provides a simple steric regulation of the entrance of the  
339 binding site due to its position as a lid above the active site.

340

341 **Fig 7. Influence of the flexibility of loop  $\beta 6\beta 7$  on the surface area of the cavity mouth.** Amino acids

342 Y138, Y70 and Y26 line the *mouth* of the cavity in the X-ray structure of Naa50 (PDB ID: **3TFY**). (A)

343 Representation of the low-energy modes affecting the surface area of the *mouth* the most. Naa50 is in

344 cartoon representation with arrows indicating the direction of the movements corresponding. Only the

345 vectors with a minimum length of  $4\text{\AA}$  are represented, with in red colour the positive factors and in blue the

346 negative ones. The trajectory is 9 frames long, with the X-ray structure coordinates found in the middle

347 (frame 5). Four frames are used to represent each direction of the vectors (from frame 1 to 4 for the positive

348 vectors and from frame 6 to 9, for the negative vectors). The contours in cyan shades represent the evolution

349 of the mouth surface area throughout the trajectory. The bold contour is obtained from the X-ray structure.

350 The surface areas are also calculated two angstroms before the mouth of the cavity (contour in pink shades)

351 to ensure that no amino acid comes closing the mouth. (B) Close up of the red square found on the cartoon

352 representation of the mode 10 in (A). Clip plane of the protein at the mouth area defined by the three

353 tyrosines (shown in pink spheres). The red surface represents the rest of the tunnel calculated by CAVER

354 Analyst where the N-terminal and the Ac-COA meets (see Experimental procedures). The contours are the

355 surface areas of the mouth depicted in cyan shades in (A). The scale indicates the range change in size of

356 the surface throughout the trajectory. The bold contour is the contour in the X-ray structure and has a size of

357  $50,5\text{\AA}$ . Small movements of the Y138 in the low-energy mode 10 impact greatly the surface area of the

358 entrance of the binding site (from  $2.5$  to  $70\text{\AA}$ ).

## 359 **Discussion**

360 The variety of NATs enables the acetylation of a wide variety of N-termini of proteins at different

361 localizations in the cell. The GNAT fold shared among all NATs and with other acetyltransferases such as

362 KATs offers a common scaffold to perform the catalytic activity. One particular feature of the GNAT fold

363 in the NATs is a tight entrance of the binding site, where the  $\beta 6\beta 7$  hairpin loop shields the active site and

## Dynamics-function relationship of NATs

364 forms a tunnel together with the  $\alpha 1$ - $\alpha 2$  region (except in Naa80). The loop seems to enable the entrance of  
365 only N-terminal amino acids (Fig. 1C). However, it remains unclear how substrates are able to enter through  
366 the tight *mouth* of the tunnel. Furthermore the path through which bisubstrate inhibitors bind remains  
367 uncertain. Using ENM-NMA we have compared the intrinsic dynamics of the GNAT fold in all available  
368 structures of NATs covering all domains of Life. We have shown that i) there is a dynamic pattern in the  
369 fold common to all NATs, ii) the  $\beta 6\beta 7$  loop is highly mobile and iii) intrinsic dynamics of the loop regulates  
370 the accessibility of the binding site.

371 We identified a common pattern in the intrinsic dynamics of the GNAT fold, where the  $\beta$ -sheet core is  
372 more rigid than the rest of the structure. The two strands,  $\beta 4$  and  $\beta 5$ , are the least flexible elements of the  $\beta$ -  
373 sheets. Interestingly, the  $\beta 4$  and  $\beta 5$  strands carry residues involved in the proton wire essential for the  
374 transfer of the acetyl. The rigidity of the catalytic core in the GNAT fold is in agreement with case-studies  
375 of enzyme dynamics where residues involved in catalysis are found to be placed at rigid conserved positions  
376 of the fold thus stabilizing amino acids essential for the function [33,56,58].

377 The catalytic core is at the crossroads of two dynamic domains that move independently from each  
378 other. The region between the C-terminal end of  $\alpha 3$  and the N-terminal end of  $\beta 5$  is found to have hinge  
379 residues that are important pivots in larger motions of the protein. The pathological Naa10 p.V107F  
380 mutation at the N-terminal end of  $\beta 5$  causes a 95% reduction of the catalytic activity compared to Naa10  
381 WT [66]. In this study, Popp et al. built a homology model of the mutant V107F and observed a disruption  
382 of hydrophobic contacts with the Met98 found on helix  $\alpha 3$  of the human Naa10. This correlates with our  
383 results and shows that perturbation of the packing density of hinges region affect function through a  
384 modification of the intrinsic structural flexibility [67].

385 The most mobile regions in NATs are the functional loops  $\alpha 1\alpha 2$ ,  $\beta 3\beta 4$  and  $\beta 6\beta 7$ . Substrate-binding  
386 residues have a tendency to be in more flexible regions than catalytic residues [56,68,69] and the  $\alpha 1\alpha 2$  and  
387  $\beta 6\beta 7$  loops carry residues involved in substrate binding [19]. The C-terminal end of helix  $\alpha 2$  has been  
388 identified as carrying a mutation (p. S37P) in the human Naa10 that is causative of the lethal Ogden  
389 syndrome [4]. Using molecular dynamics simulations on the model of the human NatA complex, we have



## Dynamics-function relationship of NATs

390 earlier shown that this mutation decreased the fluctuations of the  $\alpha 1\alpha 2$  loop and of the  $\alpha 1$  helix. Moreover  
391 the mutation impairs the catalytic activity and the formation of the NatA complex, inducing a reduction of  
392 NatA-mediated N-terminal acetylation and affecting cell proliferation [4]. The  $\alpha 1$  and  $\alpha 2$  helices are also  
393 part of the binding interface with Naa15, the auxiliary subunit of the NatA complex [17] (S2 Table). The  
394 loop  $\beta 3\beta 4$  is 10 to 15 residues longer in Naa60 than in the other NATs and mutations on key residues  
395 disrupt interactions with the  $\beta 5$ ,  $\beta 6$ , and  $\beta 7$  strands, leading to altered catalytic efficiency and protein  
396 stability [70]. Finally the  $\beta 6\beta 7$  loop, one of the most flexible loops, contains two tyrosines conserved  
397 through most of the NATs, which make hydrogen bonds with the backbone of the first and second amino  
398 acids of the substrate [19].

399       The highly mobile  $\alpha 1\alpha 2$  and  $\beta 6\beta 7$  loops flank the catalytic core regulating the size of the binding site.  
400 Moreover the regions from the N-terminal to  $\alpha 2$  and  $\beta 6$ - $\beta 7$  have structural differences among the NATs.  
401 The BC score, which quantifies similarities of intrinsic dynamics between the aligned core regions of  
402 proteins, highlighted dissimilarities between Naa40, the bacterial RimL and RimJ in one hand, and the rest  
403 of the NATs in the other hand; while Naa80 clusters on its own. Interestingly, Naa40, RimL and RimJ have  
404 longer  $\alpha 1$  and  $\alpha 2$  helices and a longer  $\alpha 1\alpha 2$  loop, which results in slight changes of the active site shape. As  
405 far as we are aware of, Naa40 is the only known NAT with a different position of the substrate in the active  
406 site. As shown in Magin et al., all the substrates in other structures have their 2<sup>nd</sup> and 3<sup>rd</sup> residues sitting  
407 close to the  $\alpha 1$  and  $\alpha 2$  helices, while the  $\alpha 2$  helix in Naa40 obstructs this region shifting the substrate  
408 towards the  $\beta 5$  and  $\beta 7$  strands [47]. The bacterial RimL is only active as a homodimer unlike the other  
409 NATs, which tend to be active as monomers complexed with auxiliary subunits forming heterodimers or  
410 heterotrimers (S2 Table). The  $\beta 6\beta 7$  loop is part of the RimL dimerization interface. Helix  $\alpha 2$  is tilted away  
411 from  $\beta 4$  yielding a larger mouth of the cavity compared to the other NATs. The longer elements in Naa40,  
412 RimJ and RimL thus illustrate how secondary structure elements lining the binding site affect its size,  
413 shape, and accessibility. In the case of Naa80, the opening to the binding site is wider than in other NATs  
414 and this is thought to play a role in its specificity for the acidic actin N-termini [48].

415       The collective motions known to support function have been shown to be well described by the lowest  
416 energy modes [63,71]. Those modes in NATs contain large movements of the  $\beta 6\beta 7$  hairpin loop with hinges

## Dynamics-function relationship of NATs

417 found at the extremities of the neighbouring strands. We have demonstrated the impact of this motion on the  
418 shape and size of the entrance of the substrate binding site using Naa50. It acetylates methionine residues  
419 followed by hydrophobic residues [72,73]. As shown in Fig. 1B, the entrance of the active site tightly  
420 surrounds its substrate. From the X-ray structure we can measure that the methionine is approximately 6Å  
421 long and observe that Val29, Tyr31, Tyr138 and Tyr139 tightly surround it. The movements of Tyr138  
422 alone, which is located on the  $\beta 6\beta 7$  loop, cause a widening of the mouth in the low energy modes. This  
423 tyrosine is actually not present in Naa40, and the bacterial RimL where it is replaced by a glycine in Naa40  
424 and asparagine or alanine in RimL. These changes might affect the substrate specificity. In general it has  
425 been observed that regions playing a role in ligand-binding have a tendency to explore more of the  
426 deformation pattern available than the catalytic site without impairing enzyme function [74].

427 Taken together, we propose that the dynamics of the two domains and the high mobility of the  $\beta 6\beta 7$   
428 loop give the ligand binding site a flexibility that is important for its selectivity. For the first time, we  
429 suggest a possible conformational change that would explain how the long bisubstrates are able to bind both  
430 the Ac-CoA and peptide substrate binding sites. Our calculations show that hinges of these movements are  
431 located at V131 and A145 in Naa10 (PDB ID: **4KVM**). Further, this loop represents a striking structural  
432 difference between NATs and KATs and is hypothesized to prevent the entrance of internal lysines in the  
433 active site [15,47,75]. Our calculations show that fairly small displacements of the  $\beta 6\beta 7$  loop as a rigid  
434 entity modify the accessibility to the active site and the Ac-CoA.  $\beta$ -hairpin loops are known to have a strong  
435 hydrophobic core and interstrand interactions keeping them compact and the turn stable [76]. The human  
436 Naa10 has been shown to acetylate internal lysines of various proteins [24,26,27,77] and the auto-  
437 acetylation on its K136 found on the  $\beta 6\beta 7$  loop could be the reason of its shift of substrate specificity  
438 towards internal lysine [78]. Acetylation of unexpected substrates might be enabled by an increased  
439 mobility of loop  $\beta 6\beta 7$  triggered by either a particular substrate or experimental conditions.

440 The importance of the dynamics-function relationship of the GNAT fold in the NATs is undeniable.  
441 Our work fills a gap in the understanding of the versatility and broad substrate specificity of the NATs  
442 enzymes [4,19]. Our results are relevant for those seeking to design inhibitors of NATs involved in cancer,  
443 Huntington's disease or other pathologies. In addition, we reveal the role played by the flexibility of the

## Dynamics-function relationship of NATs

444  $\beta\beta$ 7 hairpin loop in the opening of the ligand binding site. Further investigations are needed to  
445 experimentally evaluate the extent of the influence of the loop mobility on NATs activity and substrate  
446 specificity. This could be done by mutagenesis experiments where selected amino acids in hinge regions  
447 could be replaced by glycine or proline to increase or reduce loop mobility. Such an approach would present  
448 the advantage of not affecting the structure and stability of the  $\beta$ -hairpin itself [76,79].

449

## 450 **Materials and Methods**

### 451 **Dataset preparation**

452 Scrutinizing protein structure and fold databases such as CATH or SCOP we could not find a specific  
453 grouping for all NATs. We used the annotation of GNAT domain from PROSITE [80] (PROSITE code:  
454 PS51186) and “N-terminal protein amino acid acetylation” as a biological process in PDBe [81]. We  
455 collected more than 160 structures and filtered down to 45 structures that had annotations as N-alpha  
456 acetyltransferases or N-terminal acetyltransferases (Table 1). From these we excluded eleven structures for  
457 which the X-ray structure had unresolved segments within the GNAT fold (S1 Table).

458 We formed 10 functional groups: Naa10, Naa20, Naa40, Naa50, Naa60, Naa80, archaeal NATs, RimI,  
459 RimJ and RimL. These groups have been constituted either by considering the Enzyme Commission (EC)  
460 number, their functional annotation in scientific literature when available or the kingdom of the organism  
461 the protein is found in. All structures files were prepared for the calculations by selecting one chain in the  
462 assembly and removing the Ac-CoA or peptide substrate if present. The reference set consists in one  
463 structure, called representative, for each Uniprot code in each functional group (see PDB IDs in bold in  
464 Table 1).

465

### 466 **Structural alignment**

467 The structural alignment was obtained using MUSTANG [51] which has been shown to be efficient on  
468 distant related proteins [33,34]. The algorithm performs a progressive pairwise alignment using the position  
469 of  $C\alpha$  atoms. It extends the pairwise structural alignments into multiple structure alignments by

## Dynamics-function relationship of NATs

470 recalculating a pairwise residue-residue score at each step of the extension and progresses using a guide  
471 tree. The pairwise RMSD between Naas structures cluster is displayed as a heatmap plotted with the R  
472 function pheatmap [82]. The alignment provided is primarily used for the comparison of the intrinsic  
473 dynamics as described in Refs. [33,83].

474

### 475 **Elastic network model and Normal mode analysis (ENM-NMA)**

476 The normal mode analysis has been performed using WEBnm@ [83]. The web-tool is using an Elastic  
477 Network Model (ENM) modelling protein structures as a network of nodes, the C $\alpha$  atoms, connected  
478 together by Hookean springs. We used the Calpha force field [84,85], as implemented in the Molecular  
479 Modelling Toolkit [86]. It uses a pair potential to describe the interactions between two C $\alpha$  atoms as:

480 
$$V_{ij}(\mathbf{r}) = \frac{k_{ij}}{2} (\|\mathbf{r}_{ij}\| - \|\mathbf{r}_{ij}^0\|)^2$$

481 where  $r_{ij}$  is the distance vector between two C $\alpha$  atoms  $i$  and  $j$  in the configuration  $r$  of the protein,  $r_{ij}^0$  is  
482 then the same pairs of atoms  $i$  and  $j$  at the equilibrium conformation and  $k_{ij}$  is the non-uniform force  
483 constant defined by:

484 
$$k_{ij} = \begin{cases} a r_{ij}^0 - b, & \text{for } r_{ij}^0 < d \\ c (r_{ij}^0)^{-6}, & \text{for } r_{ij}^0 \geq d \end{cases}$$

485 with  $a = 8.6 \times 10^5 \text{ kJ mol}^{-1} \text{ nm}^{-3}$ ;  $b = 2.39 \times 10^5 \text{ kJ mol}^{-1} \text{ nm}^2$ ;  $c = 128 \text{ kJ mol}^{-1} \text{ nm}^4$  and  $d = 0.4 \text{ nm}$ .

486

487 The potential energy of the network model is then the sum of all the atomic configurations:

488 
$$V(\mathbf{r}) = \sum_{i=1}^N \sum_{j=i+1}^N V_{ij}(\mathbf{r})$$

489 where  $N$  is the number of nodes in the network.

490

## Dynamics-function relationship of NATs

491 For the normal modes calculation of the holo form of *Schizosaccharomyces pombe* Naa10 we represented  
492 CoA by 11 beads placed at the positions of atoms distant of 3 to 4Å, namely C, C3P, C6P, C9P, CCP, P1A,  
493 C4B, P3B, N9A, N6A and N3A.

494

### 495 **Normalized fluctuations**

496 The fluctuations  $F_i$  give the variances of each atom position and are given by:

497 
$$F_i = \sum_{m=7}^{3N} \frac{\|[\mathbf{d}_m]_i\|^2}{\lambda_m}$$

498 where  $\mathbf{d}_m$  is the displacement vector of the atom  $i$  in mode  $m$ .  $F_i$  is then the sum of the all the displacements  
499 of  $i$  for all the non-trivial modes that are weighted by their eigenvalues.

500

### 501 **Correlations**

502 The matrix of correlations is calculated from the normal modes [87] which quantifies the coupling between  
503 two atoms  $i$  and  $j$  as:

504 
$$C_{ij} = \frac{\sum_{m=7}^{3N} \frac{1}{\lambda_m} [\mathbf{v}_m]_i \cdot [\mathbf{v}_m]_j}{(F_i)^{\frac{1}{2}} (F_j)^{\frac{1}{2}}}$$

505

506  $C_{ij} = 1$  when the motions are completely correlated and  $C_{ij} = -1$  when they are completely anti-correlated.

507

### 508 **Bhattacharyya coefficient score**

509 Finally we used the Bhattacharyya coefficient (BC) score to compare the effective covariances of the  
510 common aligned cores of two structures A and B as implemented in WEBnm@ and is based on Fuglebakk  
511 et al. [54] :

512

## Dynamics-function relationship of NATs

513

$$BC(p_a, p_b) = \frac{|\tilde{\mathbf{A}}|^{\frac{1}{4}} |\tilde{\mathbf{B}}|^{\frac{1}{4}}}{\left| \frac{1}{2}(\tilde{\mathbf{A}} + \tilde{\mathbf{B}}) \right|^{\frac{1}{2}}}$$

514

### 515 **Trajectories and side chains reconstruction.**

516 We selected the 6 first non-trivial modes from the set of normal modes of the protein of interest. For each  
517 mode, we generated a trajectory consisting of nine snapshots; we displaced the initial C $\alpha$  positions  
518 following the mode and using arbitrary amplitudes in either direction around the X-ray structure (the mode  
519 vectors were multiplied by -12, -9, -6, -3, and 3, 6, 9, and 12).

520 We used the Molecular Modelling ToolKit (MMTK,[86]) to reconstruct the side chains in order to obtain  
521 trajectories at all-atom resolution. We calculated the 3D transformation necessary to superimpose the initial  
522 all-atom structure onto each of the snapshots of the C $\alpha$  trajectories. This was done by minimizing the RMS  
523 difference between the initial all-atom structure and the C $\alpha$  trace snapshots. The 3D transformations were  
524 not computed on the overall structure but locally using an iterative process. We used sliding windows that  
525 were three amino acids long to compute the transformation, which is then applied only to the central amino  
526 acid for which the side chain is reconstructed. The process is then iterated by sliding by one residue along  
527 the protein sequence.

528

### 529 **Visualisation and calculation of the cavity**

530 The analysis was performed using CAVER Analyst [65]. We first selected three C $\alpha$  atoms from amino acids  
531 (Tyr31, 73, and 138) that are lining the mouth of the cavity in the X-ray structure. In 3D space, these three  
532 atoms define a parallel plane to the tunnel mouth. Then a set of intersecting spheres, with a radius of 1Å, is  
533 placed on a line perpendicular to this plane to fill up the length of 5Å into the cavity. Using this geometrical  
534 structure as a base, we computed a cavity surface in each frame using the algorithm described in [65]. We  
535 do not use the extension of the algorithm proposed by Jurcik et al. [88] as it was developed for the detection  
536 of deeply buried voids inside proteins. While in our case the cavities in NATs are not fully surrounded by

## Dynamics-function relationship of NATs

537 amino acids and are closer to the protein surface. Finally, the contours of the surface area of the mouth are  
538 extracted using the MoleCollar algorithm part of CAVER Analyst and first described in Ref. [89]. The  
539 MoleCollar algorithm estimates the empty space area by triangulating a contour that is obtained by cutting  
540 the cavity surface by a plane and summing up the areas of all resulting triangles. The algorithm was  
541 modified to keep the same orientation of the cutting plane throughout the trajectory in order to follow the  
542 evolution of the surface area along the trajectories.

543

544

545 **Acknowledgements**

546 We would like to thank Konrad Hinsen (Centre de Biophysique Moléculaire in Orléans, France) for fruitful  
547 discussions on trajectory creation; Edvin Fuglebakk (Institute of Marine Research, Bergen, Norway),  
548 Sandhya Tiwari (Computational Structural Biology Research Unit, RIKEN, Japan), Bojan Krtenic  
549 (Department of Biological Sciences, University of Bergen) and Simon Mitternacht (University of Bergen  
550 Library) for their valuable comments on the manuscript.

551

552 **Conflict of interest**

553 The authors declare that they have no conflicts of interest with the contents of this article.

554 **Author contributions:**

555 Conceived and designed the experiments: AA, NR, JB, PB and TA. Performed the experiments: AA.

556 Analysed the data: AA, NR. Code development for CAVER Analyst: JB. Code development to recreate all-

557 atoms trajectories: PB. AA and NR wrote the paper with contributions from all authors.

558



## 559 **References**

- 560 1. Arnesen T, Van Damme P, Polevoda B, Helsens K, Evjenth R, Colaert N, et al. Proteomics analyses  
561 reveal the evolutionary conservation and divergence of N-terminal acetyltransferases from yeast and  
562 humans. *Proc Natl Acad Sci U S A*. 2009;106: 8157–62. doi:10.1073/pnas.0901931106
- 563 2. Drazic A, Myklebust LM, Ree R, Arnesen T. The world of protein acetylation. *Biochim Biophys*  
564 *Acta - Proteins Proteomics*. 2016;1864: 1372–1401. doi:10.1016/j.bbapap.2016.06.007
- 565 3. Kalvik T V., Arnesen T. Protein N-terminal acetyltransferases in cancer. *Oncogene*. 2013. pp. 269–  
566 276. doi:10.1038/onc.2012.82
- 567 4. Myklebust LM, Van Damme P, Støve SI, Dörfel MJ, Abboud A, Kalvik T V., et al. Biochemical and  
568 cellular analysis of Ogden syndrome reveals downstream Nt-acetylation defects. *Hum Mol Genet*.  
569 2014;24: 1956–1976. doi:10.1093/hmg/ddu611
- 570 5. Dörfel MJ, Lyon GJ. The biological functions of Naa10 - From amino-terminal acetylation to human  
571 disease. *Gene*. 2015. pp. 103–131. doi:10.1016/j.gene.2015.04.085
- 572 6. Foyn H, Jones JE, Lewallen D, Narawane R, Varhaug JE, Thompson PR, et al. Design, synthesis,  
573 and kinetic characterization of protein N-terminal acetyltransferase inhibitors. *ACS Chem Biol*.  
574 2013;8: 1121–1127. doi:10.1021/cb400136s
- 575 7. Vetting MW, Luiz LP, Yu M, Hegde SS, Magnet S, Roderick SL, et al. Structure and functions of  
576 the GNAT superfamily of acetyltransferases. *Arch Biochem Biophys*. 2005;433: 212–226.  
577 doi:10.1016/j.abb.2004.09.003
- 578 8. Lu L, Berkey KA, Casero RA. RGFGIGS Is an Amino Acid Sequence Required for Acetyl  
579 Coenzyme A Binding and Activity of Human Spermidine / Spermine N 1 Acetyltransferase \*. *J Biol*  
580 *Chem*. 1996;271: 18920–18924. doi:10.1074/jbc.271.31.18920
- 581 9. Marmorstein R. Structure of histone acetyltransferases. *J Mol Biol*. 2001;311: 433–444.  
582 doi:10.1006/jmbi.2001.4859
- 583 10. Dinh T V., Bienvenut W V., Linster E, Feldman-Salit A, Jung VA, Meinnel T, et al. Molecular  
584 identification and functional characterization of the first N $\alpha$ -acetyltransferase in plastids by global

## Dynamics-function relationship of NATs

- 585 acetylome profiling. *Proteomics*. 2015;15: 2426–2435. doi:10.1002/pmic.201500025
- 586 11. Drazic A, Aksnes H, Marie M, Boczkowska M, Varland S, Timmerman E, et al. NAA80 is actin's  
587 N-terminal acetyltransferase and regulates cytoskeleton assembly and cell motility. *Proc Natl Acad*  
588 *Sci*. 2018; 201718336. doi:10.1073/pnas.1718336115
- 589 12. Yoshikawa A, Isono S, Sheback A, Isono K. Cloning and nucleotide sequencing of the genes *rimI*  
590 and *rimJ* which encode enzymes acetylating ribosomal proteins S18 and S5 of *Escherichia coli* K12.  
591 *MGG Mol Gen Genet*. 1987;209: 481–488. doi:10.1007/BF00331153
- 592 13. Tanaka S, Matsushita Y, Yoshikawa A, Isono K. Cloning and molecular characterization of the gene  
593 *rimL* which encodes an enzyme acetylating ribosomal protein L12 of *Escherichia coli* K12. *Mol Gen*  
594 *Genet*. 1989;217: 289–93. doi:10.1007/BF02464895
- 595 14. Mackay DT, Botting CH, Taylor GL, White MF. An acetylase with relaxed specificity catalyses  
596 protein N-terminal acetylation in *Sulfolobus solfataricus*. *Mol Microbiol*. 2007;64: 1540–1548.  
597 doi:10.1111/j.1365-2958.2007.05752.x
- 598 15. Liszczak G, Arnesen T, Marmorsteins R. Structure of a ternary Naa50p (NAT5/SAN) N-terminal  
599 acetyltransferase complex reveals the molecular basis for substrate-specific acetylation. *J Biol Chem*.  
600 2011;286: 37002–37010. doi:10.1074/jbc.M111.282863
- 601 16. Magin RS, Liszczak GP, Marmorstein R. The molecular basis for Histone H4- and H2A-specific  
602 amino-terminal acetylation by NatD. *Structure*. Elsevier; 2015;23: 332–341.  
603 doi:10.1016/j.str.2014.10.025
- 604 17. Liszczak G, Goldberg JM, Foyn H, Petersson EJ, Arnesen T, Marmorstein R. Molecular basis for N-  
605 terminal acetylation by the heterodimeric NatA complex. *Nat Struct Mol Biol*. 2013;20: 1098–1105.  
606 doi:10.1038/nsmb.2636
- 607 18. Chen JY, Liu L, Cao CL, Li MJ, Tan K, Yang X, et al. Structure and function of human Naa60  
608 (NatF), a Golgi-localized bi-functional acetyltransferase. *Sci Rep*. Nature Publishing Group; 2016;6:  
609 1–12. doi:10.1038/srep31425
- 610 19. Grauffel C, Abboud A, Liszczak G, Marmorstein R, Arnesen T, Reuter N. Specificity and Versatility  
611 of Substrate Binding Sites in Four Catalytic Domains of Human N-Terminal Acetyltransferases.

## Dynamics-function relationship of NATs

- 612 PLoS One. 2012;7. doi:10.1371/journal.pone.0052642
- 613 20. Magin RS, Liszczak GP, Marmorstein R. The molecular basis for Histone H4- and H2A-specific  
614 amino-terminal acetylation by NatD. *Structure*. 2015;23: 332–341. doi:10.1016/j.str.2014.10.025
- 615 21. Montgomery DC, Sorum AW, Meier JL. Chemoproteomic profiling of lysine acetyltransferases  
616 highlights an expanded landscape of catalytic acetylation. *J Am Chem Soc*. 2014;136: 8669–8676.  
617 doi:10.1021/ja502372j
- 618 22. Liu Z, Liu Y, Wang H, Ge X, Jin Q, Ding G, et al. Patt1, a novel protein acetyltransferase that is  
619 highly expressed in liver and downregulated in hepatocellular carcinoma, enhances apoptosis of  
620 hepatoma cells. *Int J Biochem Cell Biol*. 2009;41: 2528–2537. doi:10.1016/j.biocel.2009.08.009
- 621 23. Yang X, Yu W, Shi L, Sun L, Liang J, Yi X, et al. HAT4, a Golgi Apparatus-Anchored B-Type  
622 Histone Acetyltransferase, Acetylates Free Histone H4 and Facilitates Chromatin Assembly. *Mol*  
623 *Cell*. Elsevier Inc.; 2011;44: 39–50. doi:10.1016/j.molcel.2011.07.032
- 624 24. Yoon H, Kim HL, Chun YS, Shin DH, Lee KH, Shin CS, et al. NAA10 controls osteoblast  
625 differentiation and bone formation as a feedback regulator of Runx2. *Nat Commun*. Nature  
626 Publishing Group; 2014;5: 1–14. doi:10.1038/ncomms6176
- 627 25. Ohkawa N, Sugisaki S, Tokunaga E, Fujitani K, Hayasaka T, Setou M, et al. N-acetyltransferase  
628 ARD1-NAT1 regulates neuronal dendritic development. *Genes to Cells*. 2008;13: 1171–1183.  
629 doi:10.1111/j.1365-2443.2008.01235.x
- 630 26. Wang ZLW. Inactivation of androgen-induced regulator ARD1 inhibits androgen receptor  
631 acetylation and prostate tumorigenesis. *Proc Natl Acad Sci U S A*. 2012;118: 2015–2016.  
632 doi:10.1016/j.juro.2012.07.065
- 633 27. Seo JH, Park JH, Lee EJ, Vo TTL, Choi H, Kim JY, et al. ARD1-mediated Hsp70 acetylation  
634 balances stress-induced protein refolding and degradation. *Nat Commun*. Nature Publishing Group;  
635 2016;7: 1–14. doi:10.1038/ncomms12882
- 636 28. Støve SII, Magin RSS, Foyn H, Haug BEE, Marmorstein R, Arnesen T. Crystal Structure of the  
637 Golgi-Associated Human N $\alpha$ -Acetyltransferase 60 Reveals the Molecular Determinants for  
638 Substrate-Specific Acetylation. *Structure*. 2016;24: 1044–1056. doi:10.1016/j.str.2016.04.020

## Dynamics-function relationship of NATs

- 639 29. Vetting MW, Bareich DC, Yu M, Blanchard JS. Crystal structure of RimI from Salmonella  
640 typhimurium LT2, the GNAT responsible for N(alpha)-acetylation of ribosomal protein S18. *Protein*  
641 *Sci.* 2008;17: 1781–90. doi:10.1110/ps.035899.108
- 642 30. Myklebust LM, Van Damme P, Stove SI, Dorfel MJ, Abboud A, Kalvik TV, et al. Biochemical and  
643 cellular analysis of Ogden syndrome reveals downstream Nt-acetylation defects. *Hum Mol Genet.*  
644 2014;24. doi:10.1093/hmg/ddu611
- 645 31. Micheletti C. Comparing proteins by their internal dynamics: Exploring structure-function  
646 relationships beyond static structural alignments. *Phys Life Rev. Elsevier B.V.*; 2013;10: 1–26.  
647 doi:10.1016/j.pprev.2012.10.009
- 648 32. Carnevale V, Raugei S, Micheletti C, Carloni P. Convergent dynamics in the protease enzymatic  
649 superfamily. *J Am Chem Soc.* 2006;128: 9766–9772. doi:10.1021/ja060896t
- 650 33. Tiwari SP, Reuter N. Similarity in Shape Dictates Signature Intrinsic Dynamics Despite No  
651 Functional Conservation in TIM Barrel Enzymes. *PLoS Comput Biol.* 2016;12: 1–26.  
652 doi:10.1371/journal.pcbi.1004834
- 653 34. Fuglebakk E, Tiwari SP, Reuter N. Comparing the intrinsic dynamics of multiple protein structures  
654 using elastic network models. *Biochim Biophys Acta. The Authors*; 2015;1850: 911–922.  
655 doi:10.1016/j.bbagen.2014.09.021
- 656 35. Rueda M, Chacón P, Orozco M. Thorough Validation of Protein Normal Mode Analysis: A  
657 Comparative Study with Essential Dynamics. *Structure.* 2007;15: 565–575.  
658 doi:10.1016/j.str.2007.03.013
- 659 36. Berendsen HJ, Hayward S. Collective protein dynamics in relation to function. *Curr Opin Struct*  
660 *Biol.* 2000;10: 165–169. doi:10.1016/S0959-440X(00)00061-0
- 661 37. Sathiyamoorthy K, Vijayalakshmi J, Tirupati B, Fan L, Saper MA. Structural analyses of the  
662 *Haemophilus influenzae* peptidoglycan synthase activator LpoA suggest multiple conformations in  
663 solution. *J Biol Chem.* 2017;292: 17626–17642. doi:10.1074/jbc.M117.804997
- 664 38. Chirasani VR, Revanasiddappa PD, Senapati S. Structural plasticity of cholesteryl ester transfer  
665 protein assists the lipid transfer activity. *J Biol Chem.* 2016;291: 19462–19473.

## Dynamics-function relationship of NATs

- 666 doi:10.1074/jbc.M116.744623
- 667 39. Schushan M, Rimon A, Haliloglu T, Forrest LR, Padan E, Ben-Tal N. A model-structure of a  
668 periplasm-facing state of the NhaA antiporter suggests the molecular underpinnings of pH-induced  
669 conformational changes. *J Biol Chem.* 2012;287: 18249–18261. doi:10.1074/jbc.M111.336446
- 670 40. Valadié H, Lacapčre JJ, Sanejouand YH, Etchebest C. Dynamical properties of the MscL of  
671 *Escherichia coli*: A normal mode analysis. *J Mol Biol.* 2003;332: 657–674. doi:10.1016/S0022-  
672 2836(03)00851-9
- 673 41. Oke M, Carter LG, Johnson KA, Liu H, McMahon SA, Yan X, et al. The scottish structural  
674 proteomics facility: Targets, methods and outputs. *J Struct Funct Genomics.* 2010;11: 167–180.  
675 doi:10.1007/s10969-010-9090-y
- 676 42. Liszczak G, Marmorstein R. Implications for the evolution of eukaryotic amino-terminal  
677 acetyltransferase (NAT) enzymes from the structure of an archaeal ortholog. *Proc Natl Acad Sci U S*  
678 *A.* 2013;110: 14652–7. doi:10.1073/pnas.1310365110
- 679 43. Chang Y-Y, Hsu C-H. Structural Basis for Substrate-specific Acetylation of  $N\alpha$ -acetyltransferase  
680 Ard1 from *Sulfolobus solfataricus*. *Sci Rep.* 2015;5: 8673. doi:10.1038/srep08673
- 681 44. Chang YY, Hsu CH. Multiple Conformations of the Loop Region Confers Heat-Resistance on  
682 SsArd1, a Thermophilic NatA. *ChemBioChem.* 2016;17: 214–217. doi:10.1002/cbic.201500568
- 683 45. Ma C, Pathak C, Jang S, Lee SJ, Nam M, Kim SJ, et al. Structure of *Thermoplasma volcanium* Ard1  
684 belongs to N-acetyltransferase family member suggesting multiple ligand binding modes with acetyl  
685 coenzyme A and coenzyme A. *Biochim Biophys Acta - Proteins Proteomics.* 2014;1844: 1790–  
686 1797. doi:10.1016/j.bbapap.2014.07.011
- 687 46. Hong H, Cai Y, Zhang S, Ding H, Wang H, Han A. Molecular Basis of Substrate Specific  
688 Acetylation by N-Terminal Acetyltransferase NatB. *Structure.* Elsevier Ltd.; 2017;25: 641–649.e3.  
689 doi:10.1016/j.str.2017.03.003
- 690 47. Magin RS, Liszczak GP, Marmorstein R. The molecular basis for Histone H4- and H2A-specific  
691 amino-terminal acetylation by NatD. *Structure.* Elsevier; 2015;23: 332–341.  
692 doi:10.1016/j.str.2014.10.025

## Dynamics-function relationship of NATs

- 693 48. Goris M, Magin RS, Foyn H, Myklebust LM, Varland S, Ree R, et al. Structural determinants and  
694 cellular environment define processed actin as the sole substrate of the N-terminal acetyltransferase  
695 NAA80. *Proc Natl Acad Sci.* 2018; 201719251. doi:10.1073/pnas.1719251115
- 696 49. Vetting MW, De Carvalho LPS, Roderick SL, Blanchard JS. A novel dimeric structure of the RimL  
697 Na-acetyltransferase from *Salmonella typhimurium*. *J Biol Chem.* 2005;280: 22108–22114.  
698 doi:10.1074/jbc.M502401200
- 699 50. Sakamoto K, Murayama K, Oki K, Iraha F, Kato-Murayama M, Takahashi M, et al. Genetic  
700 Encoding of 3-Iodo-L-Tyrosine in *Escherichia coli* for Single-Wavelength Anomalous Dispersion  
701 Phasing in Protein Crystallography. *Structure.* Elsevier Ltd; 2009;17: 335–344.  
702 doi:10.1016/j.str.2009.01.008
- 703 51. Konagurthu AS, Whisstock JC, Stuckey PJ, Lesk AM. MUSTANG: a multiple structural alignment  
704 algorithm. *Proteins.* 2006;64: 559–574. doi:10.1002/prot.20921
- 705 52. Aksnes H, Goris M, Strömland Ø, Drazic A, Waheed Q, Reuter N, et al. Molecular determinants of  
706 the N-Terminal acetyltransferase Naa60 anchoring to the Golgi membrane. *J Biol Chem.* 2017;292:  
707 6821–6837. doi:10.1074/jbc.M116.770362
- 708 53. Robert X, Gouet P. Deciphering key features in protein structures with the new ENDscript server.  
709 *Nucleic Acids Res.* 2014;42. doi:10.1093/nar/gku316
- 710 54. Fuglebakk E, Echave J, Reuter N. Measuring and comparing structural fluctuation patterns in large  
711 protein datasets. *Bioinformatics.* 2012;28: 2431–2440. doi:10.1093/bioinformatics/bts445
- 712 55. Van Damme P, Evjenth R, Foyn H, Demeyer K, De Bock P-J, Lillehaug JR, et al. Proteome-derived  
713 Peptide Libraries Allow Detailed Analysis of the Substrate Specificities of N<sup>α</sup>-acetyltransferases  
714 and Point to hNaa10p as the Post-translational Actin N<sup>α</sup>-acetyltransferase. *Mol Cell Proteomics.*  
715 2011;10: M110.004580. doi:10.1074/mcp.M110.004580
- 716 56. Tiwari SP, Reuter N. Conservation of intrinsic dynamics in proteins — what have computational  
717 models taught us? *Curr Opin Struct Biol.* Elsevier Ltd; 2018;50: 75–81.  
718 doi:10.1016/j.sbi.2017.12.001
- 719 57. Zen A, Carnevale V, Lesk AM, Micheletti C. Correspondences between low-energy modes in

## Dynamics-function relationship of NATs

- 720 enzymes: dynamics-based alignment of enzymatic functional families. *Protein Sci.* 2008;17: 918–  
721 929. doi:10.1110/ps.073390208
- 722 58. Yang LW, Bahar I. Coupling between catalytic site and collective dynamics: A requirement for  
723 mechanochemical activity of enzymes. *Structure.* 2005;13: 893–904. doi:10.1016/j.str.2005.03.015
- 724 59. Zheng W, Tekpinar M. Large-scale evaluation of dynamically important residues in proteins  
725 predicted by the perturbation analysis of a coarse-grained elastic model. *BMC Struct Biol.* 2009;9:  
726 45. doi:10.1186/1472-6807-9-45
- 727 60. Reuter N, Hinsen K, Lacapère JJ. Transconformations of the SERCA1 Ca-ATPase: A normal mode  
728 study. *Biophys J.* 2003;85: 2186–2197. doi:10.1016/S0006-3495(03)74644-X
- 729 61. Fenwick RB, Orellana L, Esteban-Martín S, Orozco M, Salvatella X. Correlated motions are a  
730 fundamental property of  $\beta$ -sheets. *Nat Commun.* 2014;5. doi:10.1038/ncomms5070
- 731 62. Ahmed A, Villinger S, Gohlke H. Large-scale comparison of protein essential dynamics from  
732 molecular dynamics simulations and coarse-grained normal mode analyses. *Proteins Struct Funct*  
733 *Bioinforma.* 2010;78: 3341–3352. doi:10.1002/prot.22841
- 734 63. Echave J. Why are the low-energy protein normal modes evolutionarily conserved?\*. *Pure Appl*  
735 *Chem.* 2012;84: 1931–1937. doi:http://dx.doi.org/10.1351/PAC-CON-12-02-15
- 736 64. Kurkcuoglu Z, Bakan A, Kocaman D, Bahar I, Doruker P. Coupling between Catalytic Loop  
737 Motions and Enzyme Global Dynamics. *PLoS Comput Biol.* 2012;8: 1–11.  
738 doi:10.1371/journal.pcbi.1002705
- 739 65. Jurcik A, Bednar D, Byska J, Marques SM, Furmanova K, Daniel L, et al. CAVER Analyst 2.0 :  
740 Analysis and Visualization of Channels and Tunnels in Protein Structures and Molecular Dynamics  
741 Trajectories. *Bioinformatics.* 2018; 9–10. doi:10.1093/bioinformatics/bty386/4993945
- 742 66. Popp B, Støve SI, Endelev S, Myklebust LM, Hoyer J, Sticht H, et al. De novo missense mutations in  
743 the NAA10 gene cause severe non-syndromic developmental delay in males and females. *Eur J Hum*  
744 *Genet.* 2015;23: 602–609. doi:10.1038/ejhg.2014.150
- 745 67. Shahmoradi A, Sydykova DK, Spielman SJ, Jackson EL, Dawson ET, Meyer AG, et al. Predicting  
746 Evolutionary Site Variability from Structure in Viral Proteins: Buriedness, Packing, Flexibility, and

## Dynamics-function relationship of NATs

- 747 Design. *J Mol Evol.* 2014;79: 130–142. doi:10.1007/s00239-014-9644-x
- 748 68. Bahar I, Cheng MH, Lee JY, Kaya C, Zhang S. Structure-Encoded Global Motions and Their Role  
749 in Mediating Protein-Substrate Interactions. *Biophysical Journal.* 2015. pp. 1101–1109.  
750 doi:10.1016/j.bpj.2015.06.004
- 751 69. Lovera S, Morando M, Pucheta-Martinez E, Martinez-Torrecuadrada JL, Saladino G, Gervasio FL.  
752 Towards a Molecular Understanding of the Link between Imatinib Resistance and Kinase  
753 Conformational Dynamics. *PLoS Comput Biol.* 2015;11. doi:10.1371/journal.pcbi.1004578
- 754 70. Støve SII, Magin RSS, Foyn H, Haug BEE, Marmorstein R, Arnesen T. Crystal Structure of the  
755 Golgi-Associated Human N $\alpha$ -Acetyltransferase 60 Reveals the Molecular Determinants for  
756 Substrate-Specific Acetylation. *Structure.* 2016;24: 1044–1056. doi:10.1016/j.str.2016.04.020
- 757 71. Tama F, Sanejouand Y-H. Conformational change of proteins arising from normal mode  
758 calculations. *Protein Eng Des Sel.* 2001;14: 1–6. doi:10.1093/protein/14.1.1
- 759 72. Evjenth RH, Brenner AK, Thompson PR, Arnesen T, Frøystein NÅ, Lillehaug JR. Human protein  
760 N-terminal acetyltransferase hNaa50p (hNAT5/hSAN) follows ordered sequential catalytic  
761 mechanism: Combined kinetic and NMR study. *J Biol Chem.* 2012;287: 10081–10088.  
762 doi:10.1074/jbc.M111.326587
- 763 73. Evjenth R, Hole K, Karlsen OA, Ziegler M, Arnesen T, Lillehaug JR. Human Naa50p (Nat5/San)  
764 displays both protein N $\alpha$ - and N $\epsilon$ -acetyltransferase activity. *J Biol Chem.* 2009;284: 31122–31129.  
765 doi:10.1074/jbc.M109.001347
- 766 74. Velázquez-Muriel JA, Rueda M, Cuesta I, Pascual-Montano A, Orozco M, Carazo JM. Comparison  
767 of molecular dynamics and superfamily spaces of protein domain deformation. *BMC Struct Biol.*  
768 2009;9: 1–14. doi:10.1186/1472-6807-9-6
- 769 75. Magin RS, March ZM, Marmorstein R. The N-terminal acetyltransferase Naa10/ARD1 does not  
770 acetylate lysine residues. *J Biol Chem.* 2016;291: 5270–5277. doi:10.1074/jbc.M115.709428
- 771 76. Jager M, Deechongkit S, Koepf EK, Nguyen H, Gao J, Powers ET, et al. Understanding the  
772 mechanism of beta-sheet folding from a chemical and biological perspective. *Biopolymers.* 2008;90:  
773 751–758. doi:10.1002/bip.21101



## Dynamics-function relationship of NATs

- 774 77. Lim JH, Park JW, Chun YS. Human arrest defective 1 acetylates and activates beta-catenin,  
775 promoting lung cancer cell proliferation. *Cancer Res.* 2006;66: 10677–10682. doi:10.1158/0008-  
776 5472.CAN-06-3171
- 777 78. Seo JH, Cha JH, Park JH, Jeong CH, Park ZY, Lee HS, et al. Arrest defective 1 autoacetylation is a  
778 critical step in its ability to stimulate cancer cell proliferation. *Cancer Res.* 2010;70: 4422–4432.  
779 doi:10.1158/0008-5472.CAN-09-3258
- 780 79. Reinke T. Muller, Timothy Travers, Hi-jea Cha, Joshua L. Phillips, S. Gnanakaran KMP. Switch  
781 loop flexibility affects substrate transport of the AcrB efflux pump. *J Mol Biol.* Elsevier Ltd; 2017;  
782 22. doi:10.1016/j.jmb.2017.09.018
- 783 80. Sigrist CJA, De Castro E, Cerutti L, Cuche BA, Hulo N, Bridge A, et al. New and continuing  
784 developments at PROSITE. *Nucleic Acids Res.* 2013;41: 344–347. doi:10.1093/nar/gks1067
- 785 81. Velankar S, Van Ginkel G, Alhroub Y, Battle GM, Berrisford JM, Conroy MJ, et al. PDBe:  
786 Improved accessibility of macromolecular structure data from PDB and EMDB. *Nucleic Acids Res.*  
787 2016;44: D385–D395. doi:10.1093/nar/gkv1047
- 788 82. Kolde R. Package `pheatmap`. *Bioconductor.* 2012; 1–6.
- 789 83. Tiwari SP, Fuglebakk E, Hollup SM, Skjærven L, Cragnolini T, Grindhaug SH, et al. WEBnm@  
790 v2.0: Web server and services for comparing protein flexibility. *BMC Bioinformatics.* 2014;15: 427.  
791 doi:10.1186/s12859-014-0427-6
- 792 84. Hinsen K. Analysis of domain motions by approximate normal mode calculations. *Proteins Struct*  
793 *Funct Genet.* 1998;33: 417–429. doi:10.1002/(SICI)1097-0134(19981115)33:3<417::AID-  
794 PROT10>3.0.CO;2-8
- 795 85. Hinsen K, Petrescu AJ, Dellerue S, Bellissent-Funel MC, Kneller GR. Harmonicity in slow protein  
796 dynamics. *Chem Phys.* 2000;261: 25–37. doi:10.1016/S0301-0104(00)00222-6
- 797 86. Hinsen K. The molecular modeling toolkit: A new approach to molecular simulations. *J Comput*  
798 *Chem.* 2000;21: 79–85. doi:10.1002/(SICI)1096-987X(20000130)21:2<79::AID-JCC1>3.0.CO;2-B
- 799 87. Ichiye T, Karplus M. Collective motions in proteins: A covariance analysis of atomic fluctuations in  
800 molecular dynamics and normal mode simulations. *Proteins Struct Funct Bioinforma.* 1991;11: 205–

## Dynamics-function relationship of NATs

- 801 217. doi:10.1002/prot.340110305
- 802 88. Jurčík A, Byška J, Sochor J, Kozlíková B. Visibility-based approach to surface detection of tunnels  
803 in proteins. Proc 31st Spring Conf Comput Graph - SCCG '15. 2015; 65–72.  
804 doi:10.1145/2788539.2788548
- 805 89. Byška J, Jurčík A, Gröller ME, Viola I, Kozlíková B. MoleCollar and Tunnel Heat Map  
806 Visualizations for Conveying Spatio-Temporo-Chemical Properties Across and Along Protein  
807 Voids. Comput Graph Forum. 2015;34: 1–10. doi:10.1111/cgf.12612
- 808 90. Arnesen T, Anderson D, Baldersheim C, Lanotte M, Varhaug JE, Lillehaug JR. Identification and  
809 characterization of the human ARD1-NATH protein acetyltransferase complex. Biochem J.  
810 2005;386: 433–443. doi:10.1042/BJ20041071
- 811 91. Polevoda B, Cardillo TS, Doyle TC, Bedi GS, Sherman F. Nat3p and Mdm20p are required for  
812 function of yeast NatB N $\alpha$ -terminal acetyltransferase and of actin and tropomyosin. J Biol Chem.  
813 2003;278: 30686–30697. doi:10.1074/jbc.M304690200
- 814 92. Starheim KK, Arnesen T, Gromyko D, Rynningen A, Varhaug JE, Lillehaug JR. Identification of the  
815 human N  $\alpha$  -acetyltransferase complex B (hNatB): a complex important for cell-cycle progression.  
816 Biochem J. 2008;415: 325–331. doi:10.1042/BJ20080658
- 817 93. Van Damme P, Lasa M, Polevoda B, Gazquez C, Elosegui-Artola A, Kim DS, et al. N-terminal  
818 acetylome analyses and functional insights of the N-terminal acetyltransferase NatB. Proc Natl Acad  
819 Sci. 2012;109: 12449–12454. doi:10.1073/pnas.1210303109
- 820 94. Song OK, Wang X, Waterborg JH, Sternglanz R. An N $\alpha$ -acetyltransferase responsible for  
821 acetylation of the N-terminal residues of histones H4 and H2A. J Biol Chem. 2003;278: 38109–  
822 38112. doi:10.1074/jbc.C300355200
- 823 95. Arnesen T, Anderson D, Torsvik J, Halseth HB, Varhaug JE, Lillehaug JR. Cloning and  
824 characterization of hNAT5/hSAN: An evolutionarily conserved component of the NatA protein N- $\alpha$ -  
825 acetyltransferase complex. Gene. 2006;371: 291–295. doi:10.1016/j.gene.2005.12.008
- 826 96. Van Damme P, Hole K, Gevaert K, Arnesen T. N-terminal acetylome analysis reveals the specificity  
827 of Naa50 (Nat5) and suggests a kinetic competition between N-terminal acetyltransferases and

## Dynamics-function relationship of NATs

- 828 methionine aminopeptidases. *Proteomics*. 2015;15: 2436–2446. doi:10.1002/pmic.201400575
- 829 97. Aksnes H, Van Damme P, Goris M, Starheim KK, Marie M, Støve SI, et al. An organellar  $\alpha$ -  
830 acetyltransferase, naa60, acetylates cytosolic n termini of transmembrane proteins and maintains  
831 golgi integrity. *Cell Rep*. 2015;10: 1362–1374. doi:10.1016/j.celrep.2015.01.053
- 832 98. Roy-Chaudhuri B, Kirthi N, Kelley T, Culver GM. Suppression of a cold-sensitive mutation in  
833 ribosomal protein S5 reveals a role for RimJ in ribosome biogenesis. *Mol Microbiol*. 2008;68: 1547–  
834 1559. doi:10.1111/j.1365-2958.2008.06252.x
- 835
- 836

837 **Supporting Information**

838 **S1 Fig. Effect of the presence of a cofactor or a bisubstrate on the normalized fluctuations of the Naa10**  
839 **from *Saccharomyces pombe*.** Naa10 from *S. pombe* has been crystallized with Naa15 (PDB id: 4kvm and  
840 4kvo) and without Naa15 (PDB id: 4kvx). The main difference between the structures of the two states is a  
841 rearrangement of helix  $\alpha 2$  and of the  $\alpha 1\alpha 2$  loop. The experimental structures of the complexed Naa10 form  
842 contain either a bisubstrate inhibitor (4kvm) or only a cofactor (4kvo). The structure of the uncomplexed  
843 Naa10 form has only the cofactor (4kvx). The computations were performed on the X-ray structures with  
844 their ligand bound, and on the same protein structures after removal of the ligand.

845 **S2 Fig. Heatmap representation of the pairwise Root Mean Square Deviations (RMSD) for**  
846 **representatives structure.** The dendrogram reflects the hierarchical clustering based on the RMSD values.  
847 The heatmap color scale goes from red ( $0\text{\AA} < \text{RMSD} < 1\text{\AA}$ ; structural similarity) to yellow ( $3\text{\AA} < \text{RMSD} <$   
848  $4\text{\AA}$ ). Names of enzymes from eukaryotes are highlighted in blue, those of bacteria in purple and green is  
849 used for archaeal NATs.

850 **S2 Fig. Correlations maps for the representative of each NAT group.** Dark red and blue show correlated  
851 motions between pairs of residues (close to 1 or -1, respectively), when lighter colours refer to correlations  
852 close to 0. Long-range correlations are found within two blocks highlighted by the green and pink frames.  
853 For all the NATs the highest correlations are found within these blocks and not in-between.

854 **S1 Table. Structure dataset.**

855 **S2 Table. Ligand specificity of NAT enzymes included in the dataset.** The information in this table is  
856 collected from the following references: ArNat [14,42], NatA [1,17,55,90], NatB [91–93], NatD [47,94],  
857 NatE [73,95,96], NatF [52,97], NatH [11,48], RimI [12,29], RimJ [12,98], RimL [13,49].

**A**

GNAT fold

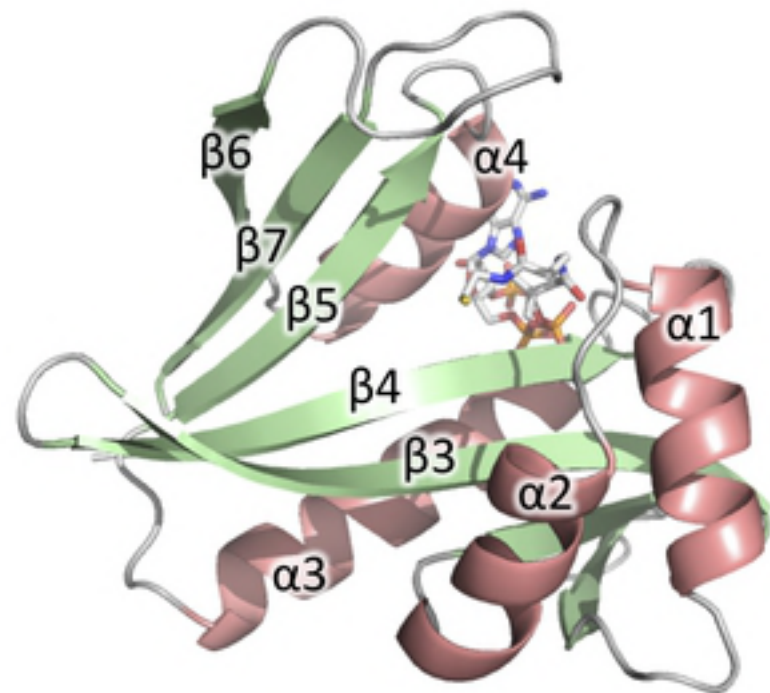**B**

Naa50 – MLG substrate

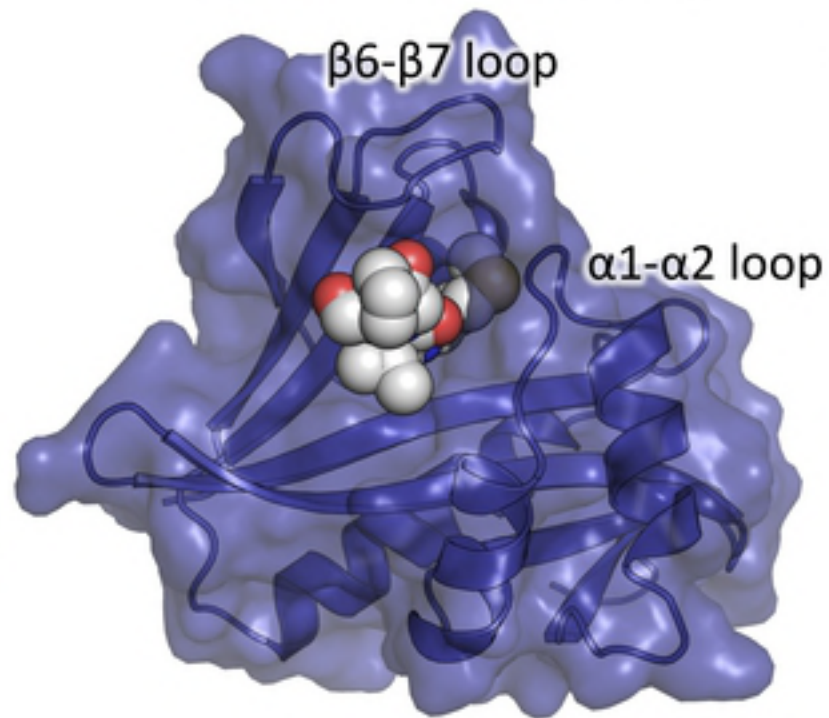**C**

Naa60 – bisubstrate

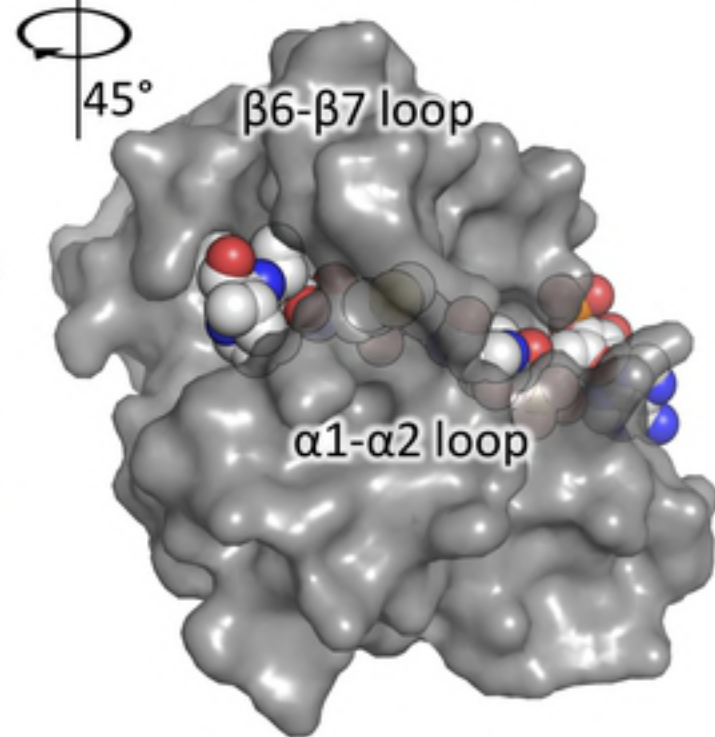

Fig1

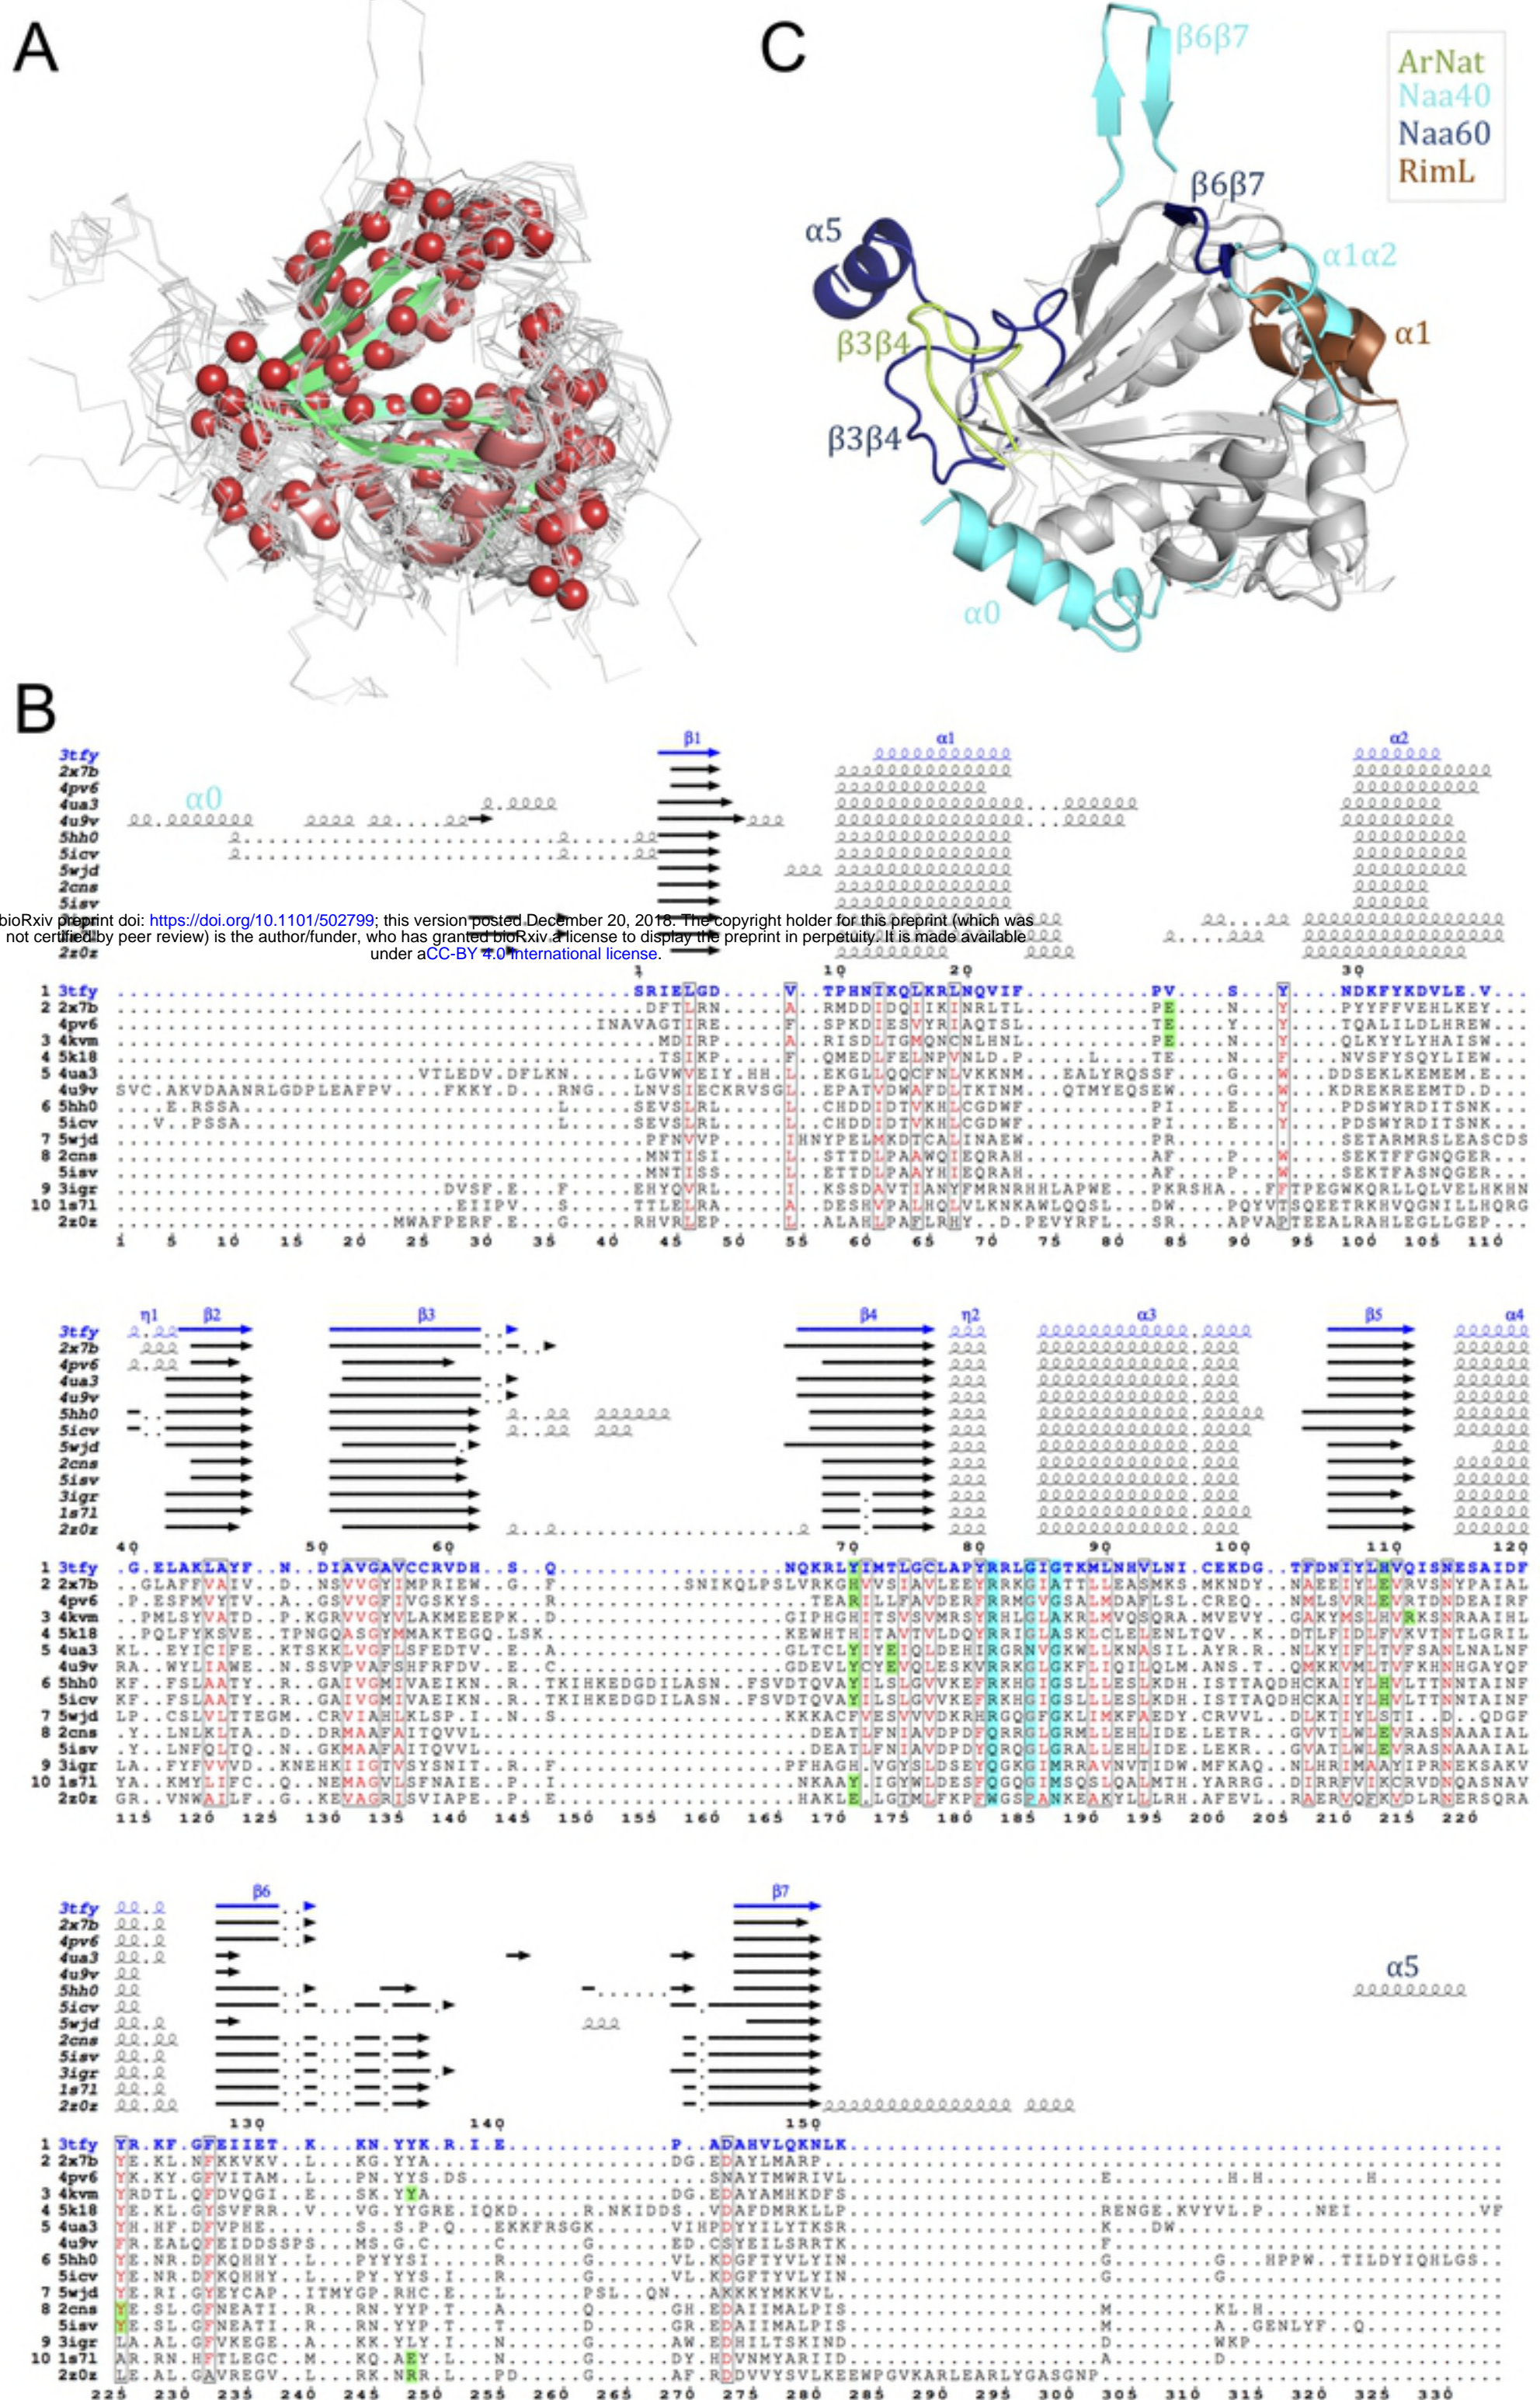

Fig2

A

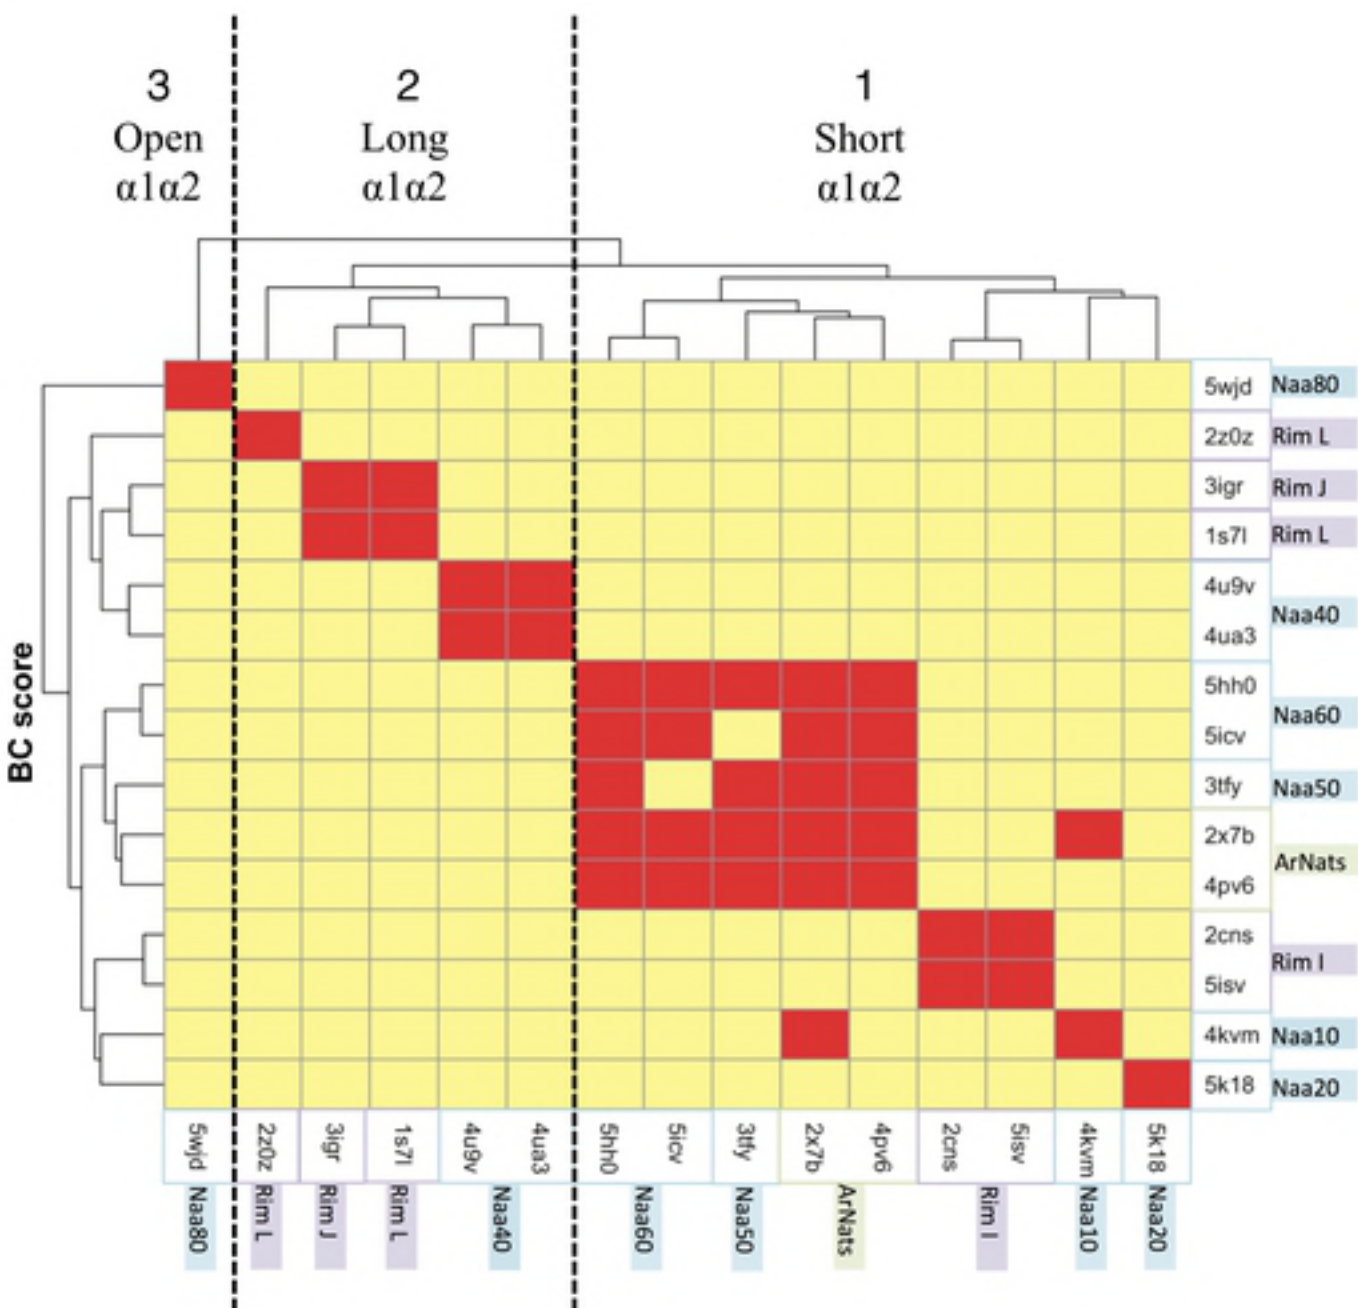

B

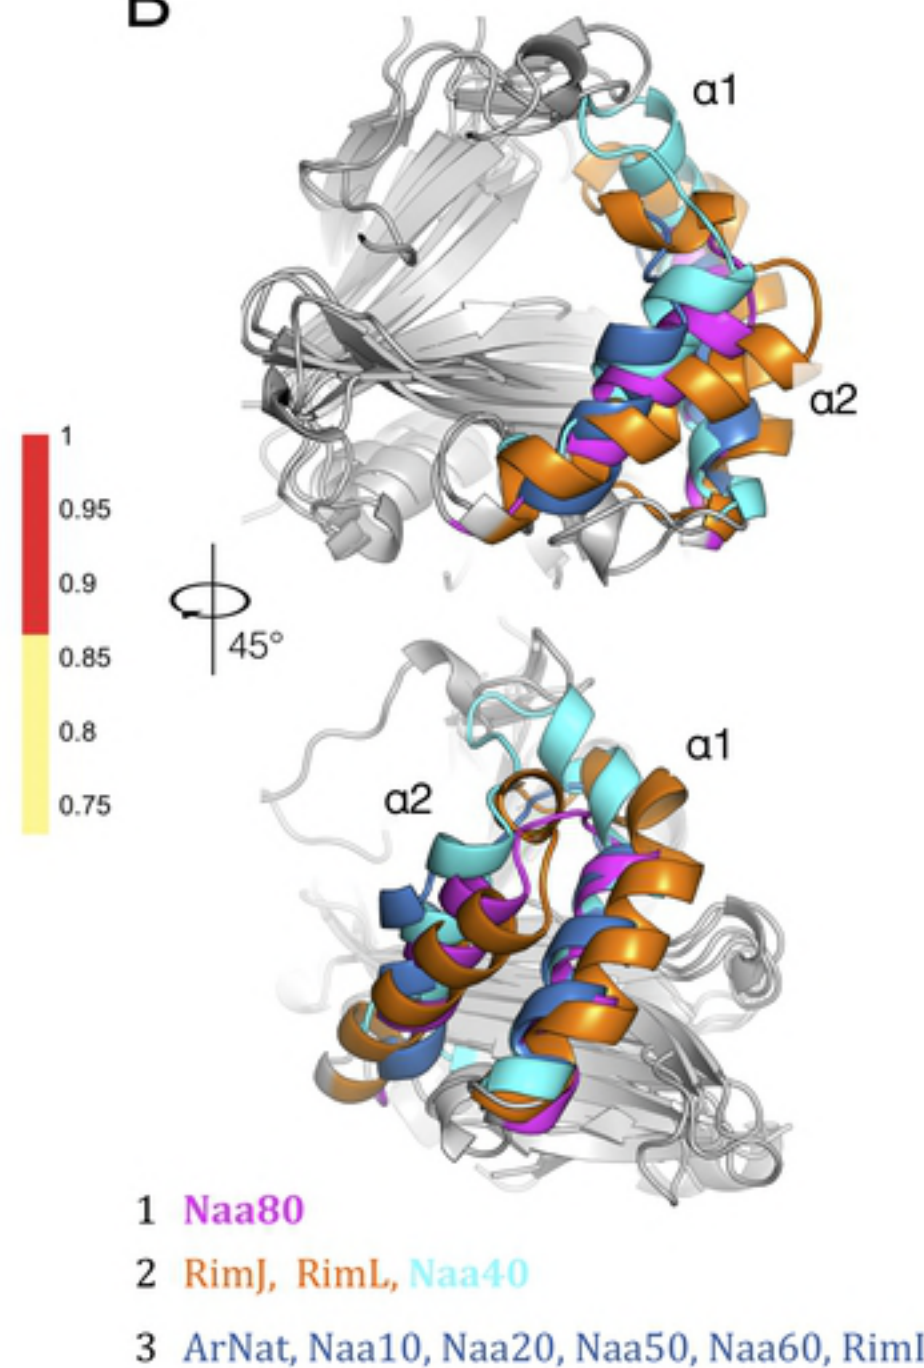

Fig4

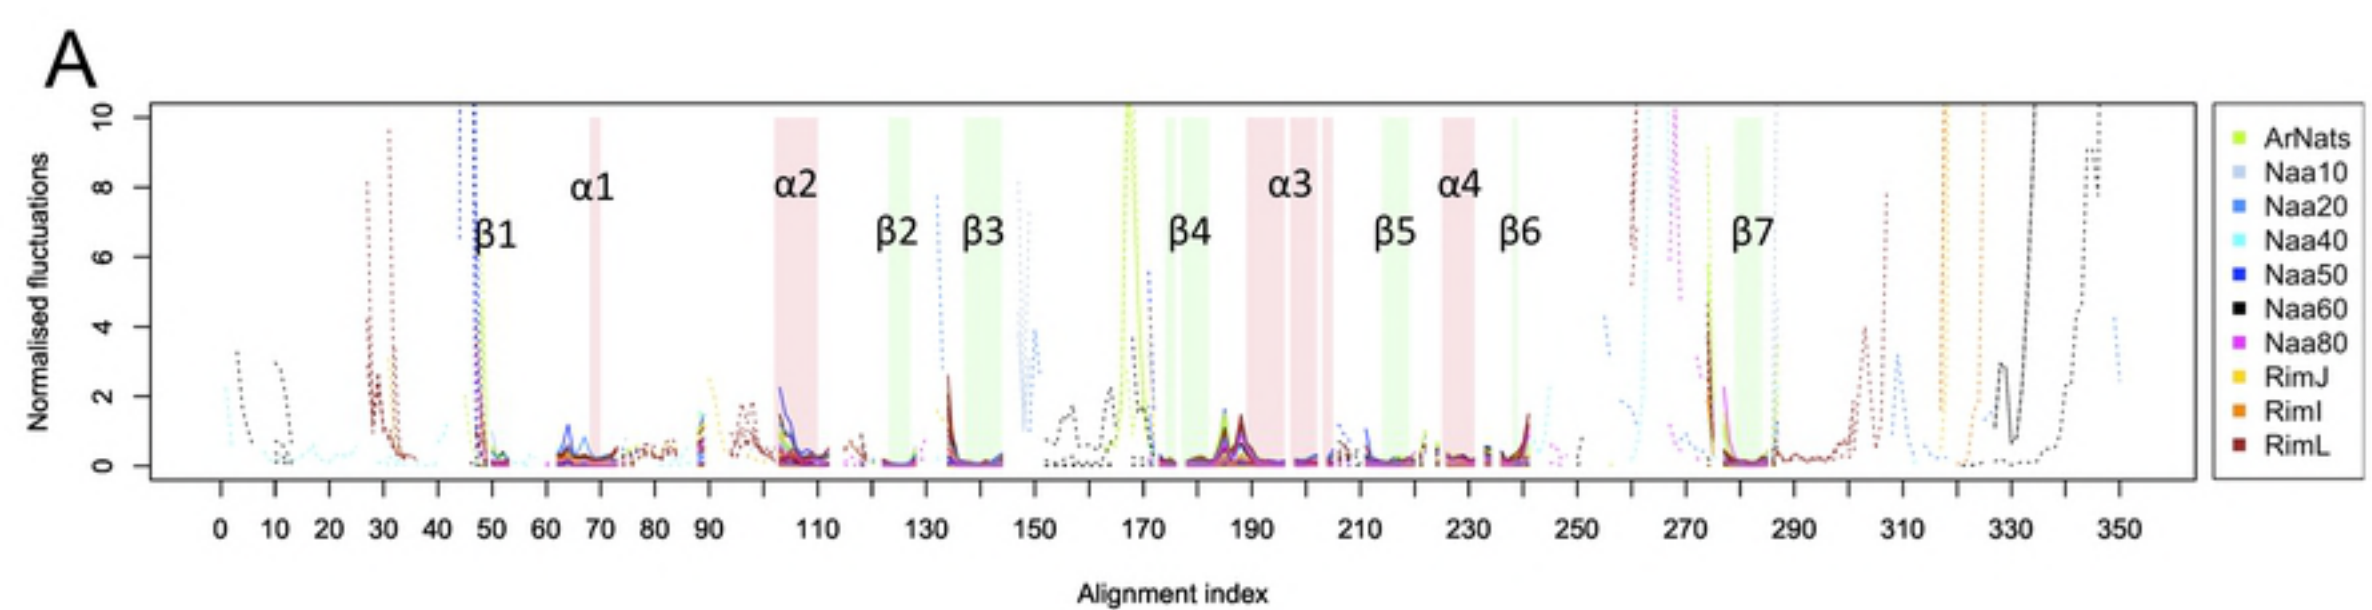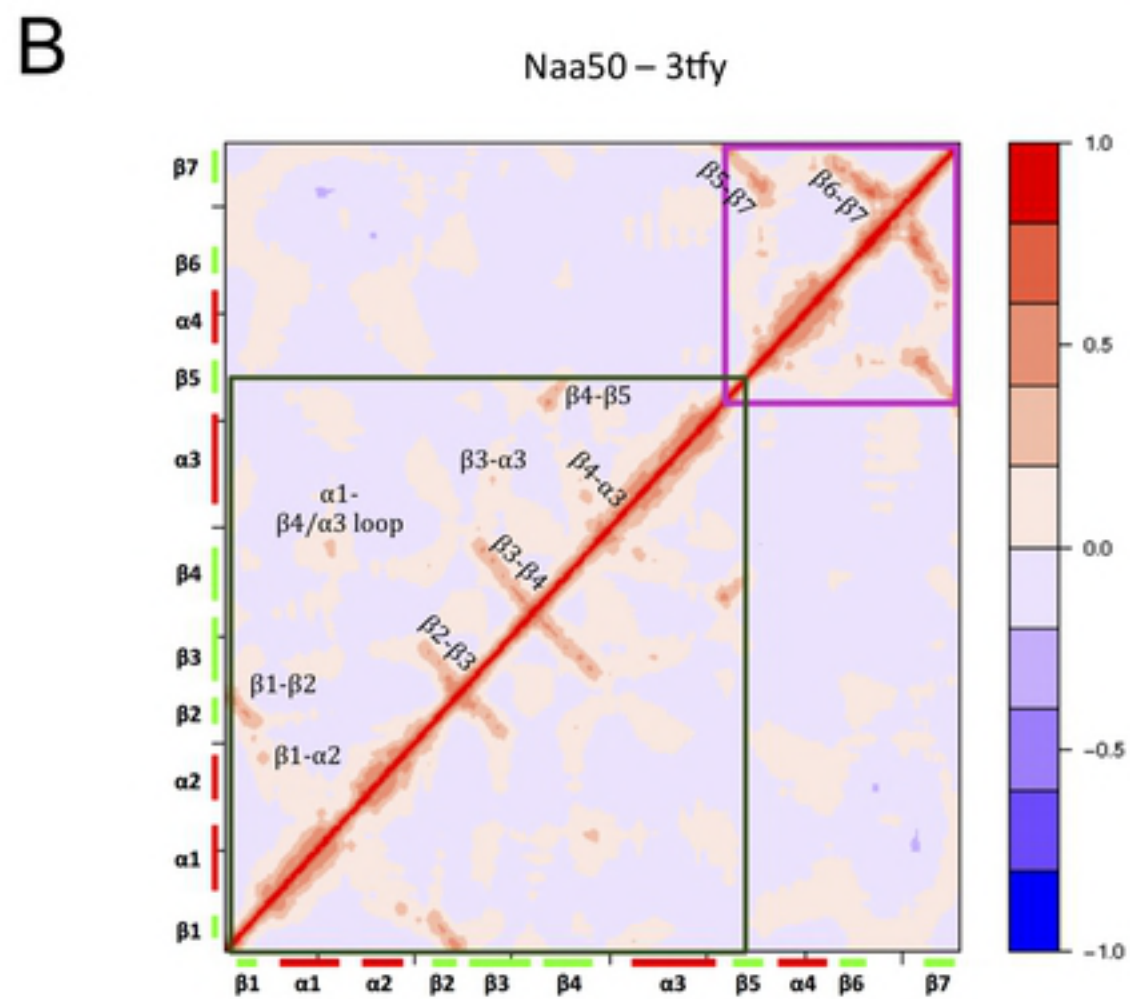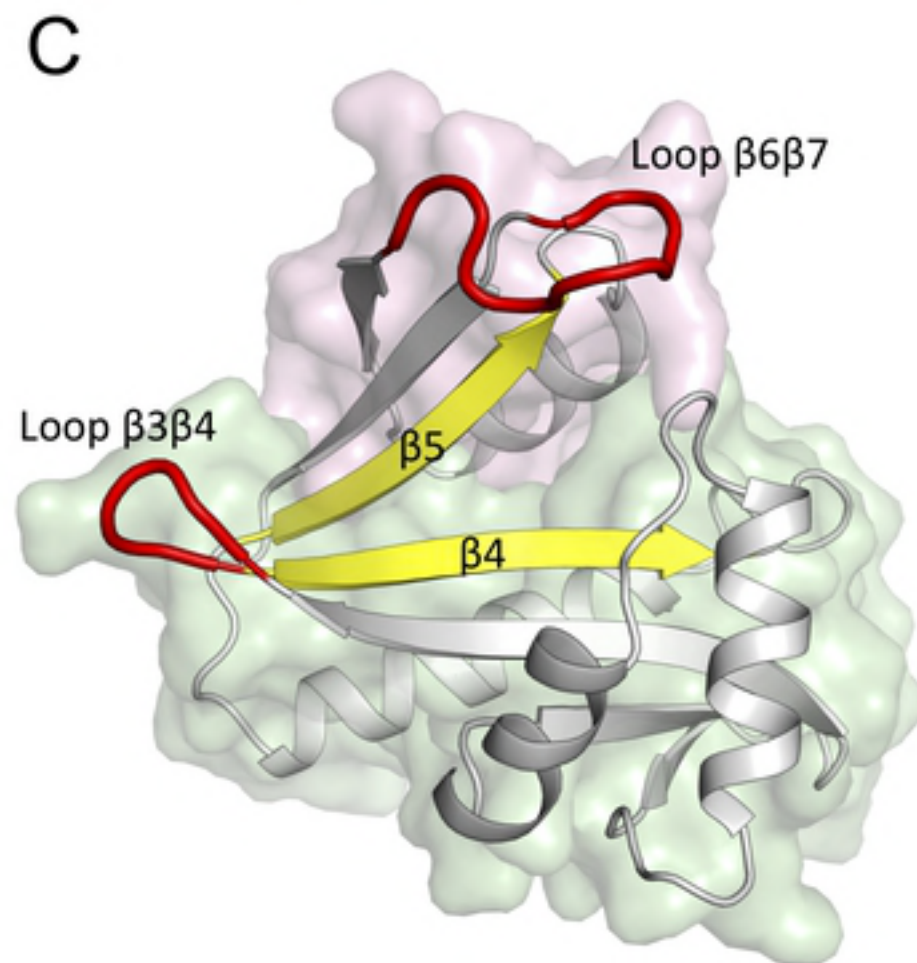

Fig5



# Naa40 – 4u9v

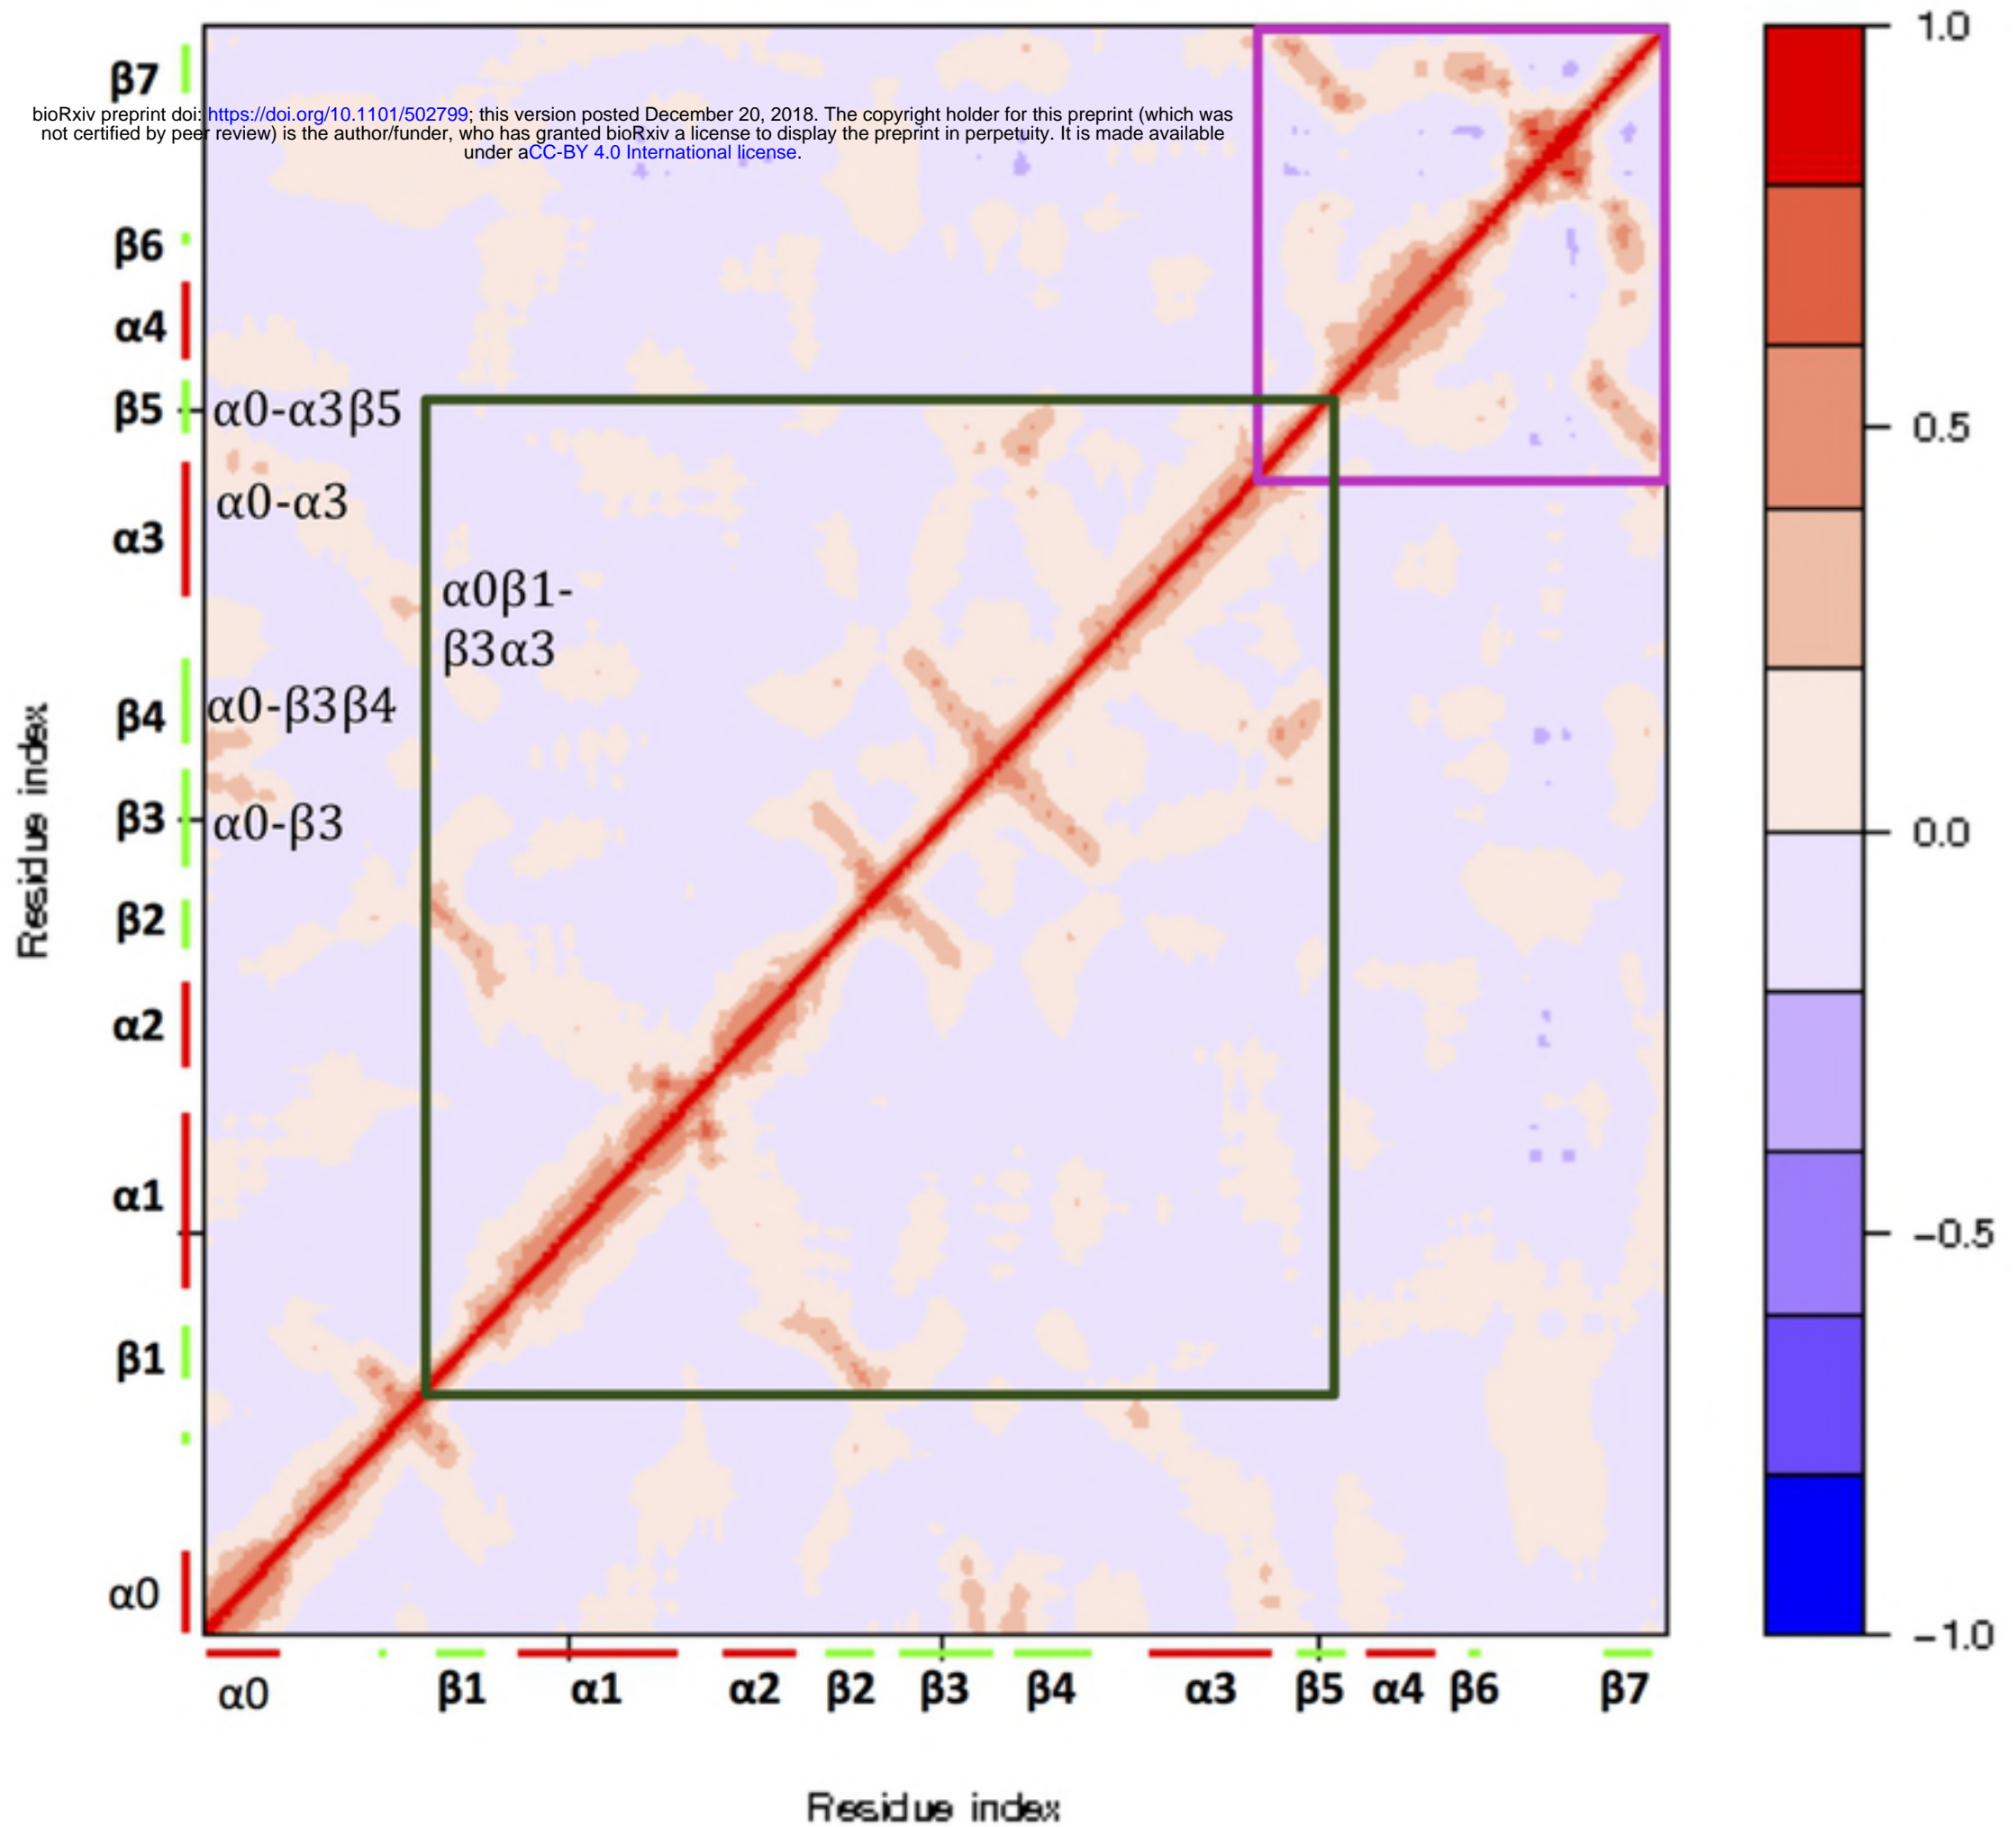

Fig6

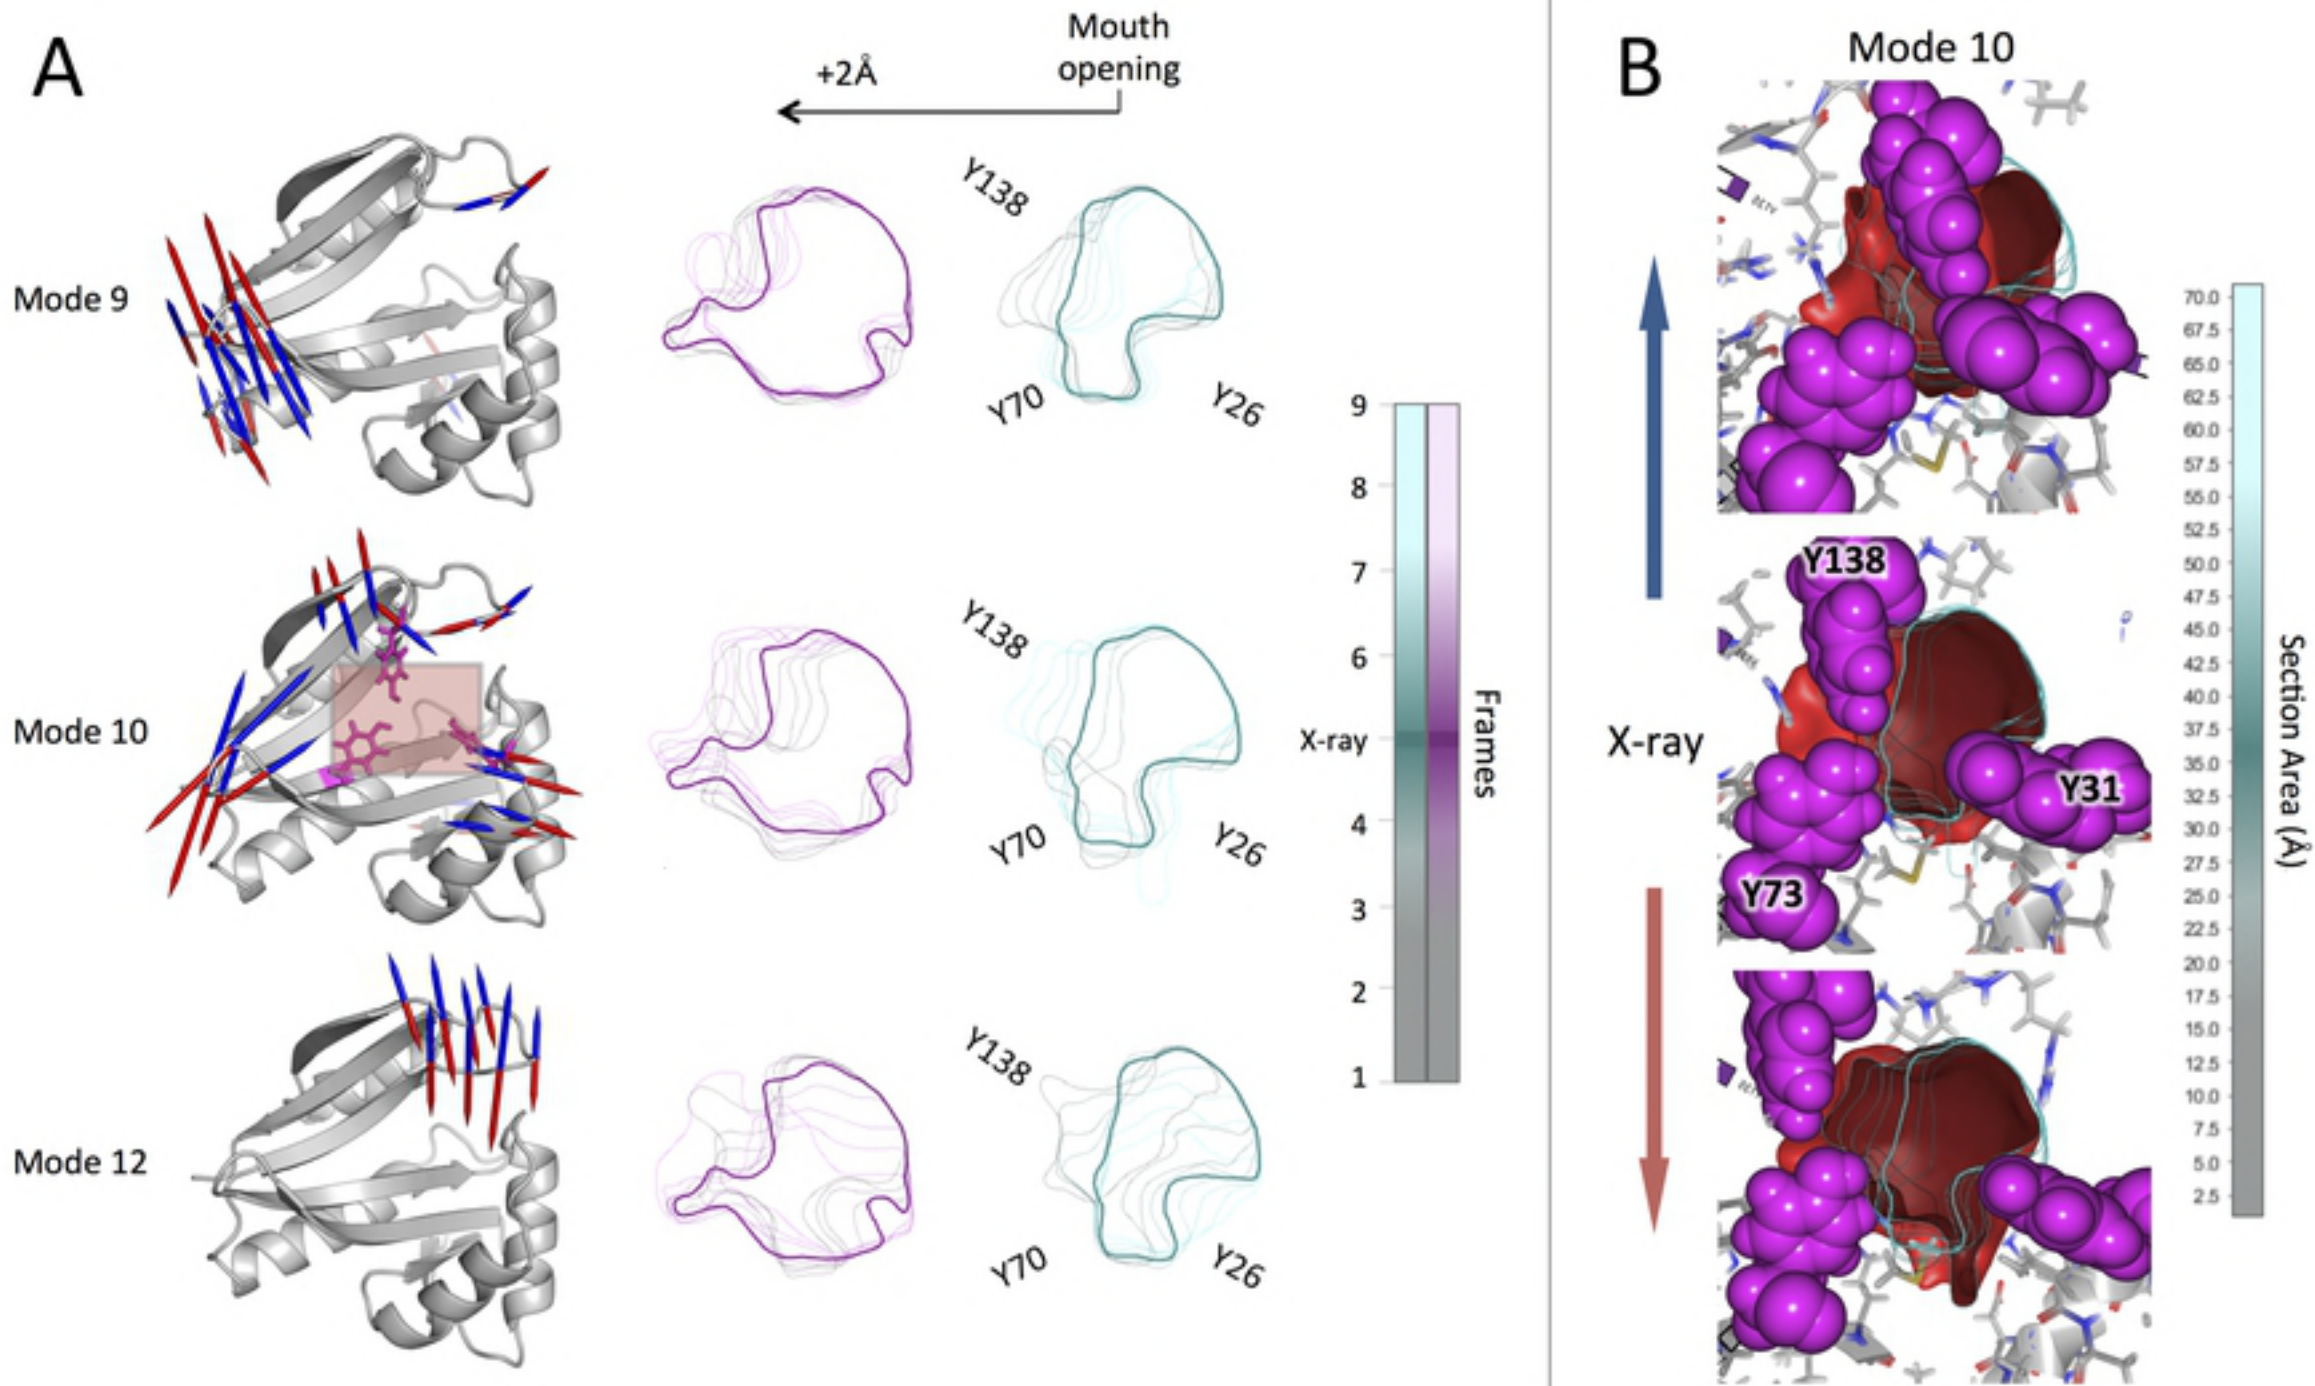

Fig7

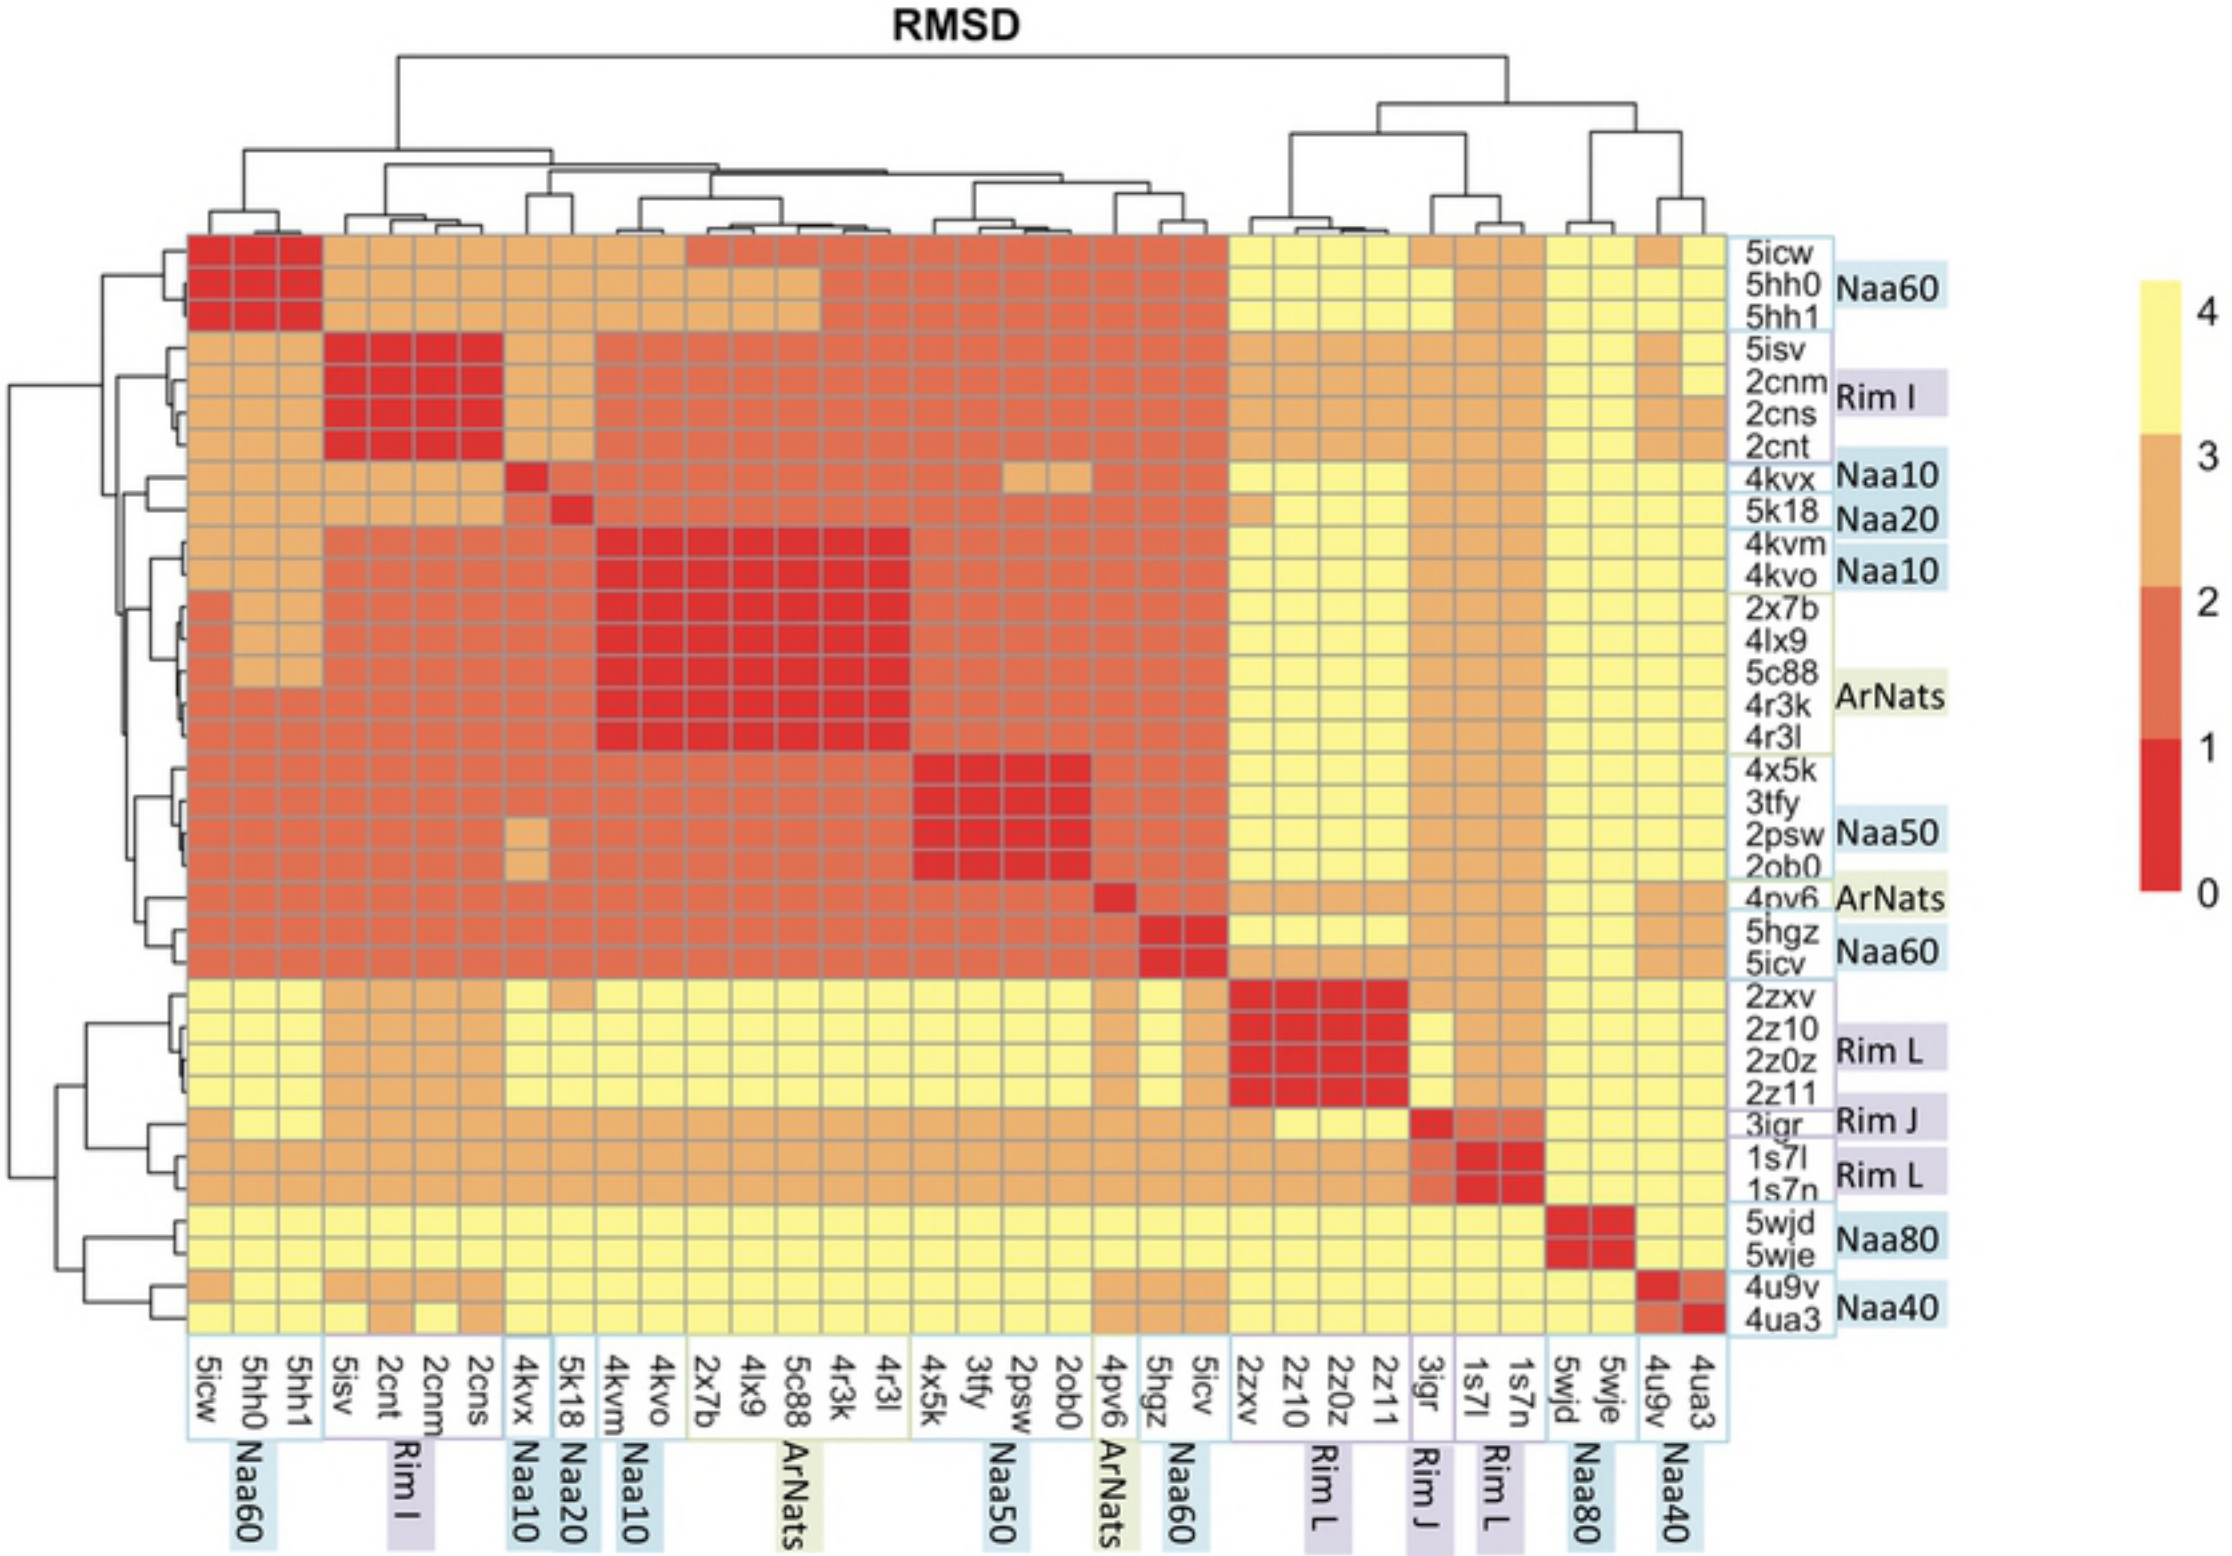

Fig3
